# Supplementary material
Source: PubMed Central journal article supplement (PMC5709732)
Supplement: EMBJ-36-3517-s001.pdf [file EMBJ-36-3517-s001.pdf]

## Supplemental Information

### An affinity switch controls hierarchical Type III protein targeting and secretion

Athina G. Portaliou<sup>1</sup>, Konstantinos C. Tsolis<sup>1</sup>, Maria S. Loos<sup>1</sup>, Vasileia Balabanidou<sup>2</sup>, Joseph Rayo<sup>1</sup>, Alexandra Tsirigotaki<sup>1</sup>, Valerie F. Crepin<sup>4</sup>, Gad Frankel<sup>4</sup>, Charalampos G. Kalodimos<sup>3</sup>, Spyridoula Karamanou<sup>1\*</sup> and Anastassios Economou<sup>1\*</sup>

<sup>1</sup>KU Leuven, Department of Microbiology and Immunology, Rega Institute for Medical Research, Laboratory of Molecular Bacteriology, B-3000 Leuven, Belgium

<sup>2</sup>Institute of Molecular Biology and Biotechnology, FORTH and Department of Biology, University of Crete, PO Box 1385, GR-711 10 Iraklio, Crete, Greece

<sup>3</sup>University of Minnesota, Biochemistry, Molecular Biology & Biophysics, 321 Church St, Minneapolis MN 55455, USA

<sup>4</sup>Faculty of Natural Sciences, Department of Life Sciences, Imperial College London, UK

\*For correspondence:

Anastassios Economou ([tassos.economou@kuleuven.be](mailto:tassos.economou@kuleuven.be))

Spyridoula Karamanou ([lily.karamanou@kuleuven.be](mailto:lily.karamanou@kuleuven.be))

#### Abbreviations

EPEC: Enteropathogenic *E. coli*

T3S: Type 3 Secretion

T3SS: Type 3 Secretion System

AHT: Anhydrotetracycline

IMVs: Inverted Membrane Vesicles

HDX: Hydrogen Deuterium Exchange

MS: Mass Spectrometry

MALS: Multi Angle Light Scattering

DMEM: Dulbecco's Modified Eagle Medium

TCA: Trichloroacetic Acid

DDM: *n*-Dodecyl- $\beta$ -D-maltopyranoside

## Table of contents

### Supplementary Figures:

**Figure S1:** T3SS elements required for CesAB/EspA membrane targeting (Related to Figure 3 and 6)

**Figure S2:** *in vivo* characterization of SepL and EscV mutants (Related to Figures 4 and 6)

### Supplementary Table:

**Table S1:** Hydrogen/Deuterium exchange profile of CesAB (Related to Figure 1)

**Table S2:** T3SS proteins identified by LC-MS/MS (Related to Figure 2)

### Supplementary materials and methods

- Buffers
- Antisera
- Dyes and labeled secondary antibodies
- Vectors
- Genetic constructs
- Bacterial strains
- List of primers
  - Primers used for gene cloning and mutagenesis
  - Primers used for gene replacement
- Synthetic genes
- Immobilized peptide arrays
- Preparation of Inverted Inner Membrane Vesicles (IMVs)
- *In vitro* protein labelling with [<sup>35</sup>S]-methionine
- Affinity measurements/ Determination of equilibrium dissociation constants ( $K_{ds}$ )
- CesAB/EspA *in vivo* and *in vitro* cross-linking
- IMVs immunostaining coupled with electron microscopy
- Hydrogen-deuterium exchange (HDX) mass spectrometry (MS)
- Surface proteolysis of IMVs
- LC-MS/MS analysis
- MS data analysis
- Western Blot analysis
- Analysis of protein structures

### References

## Supplementary Figures:

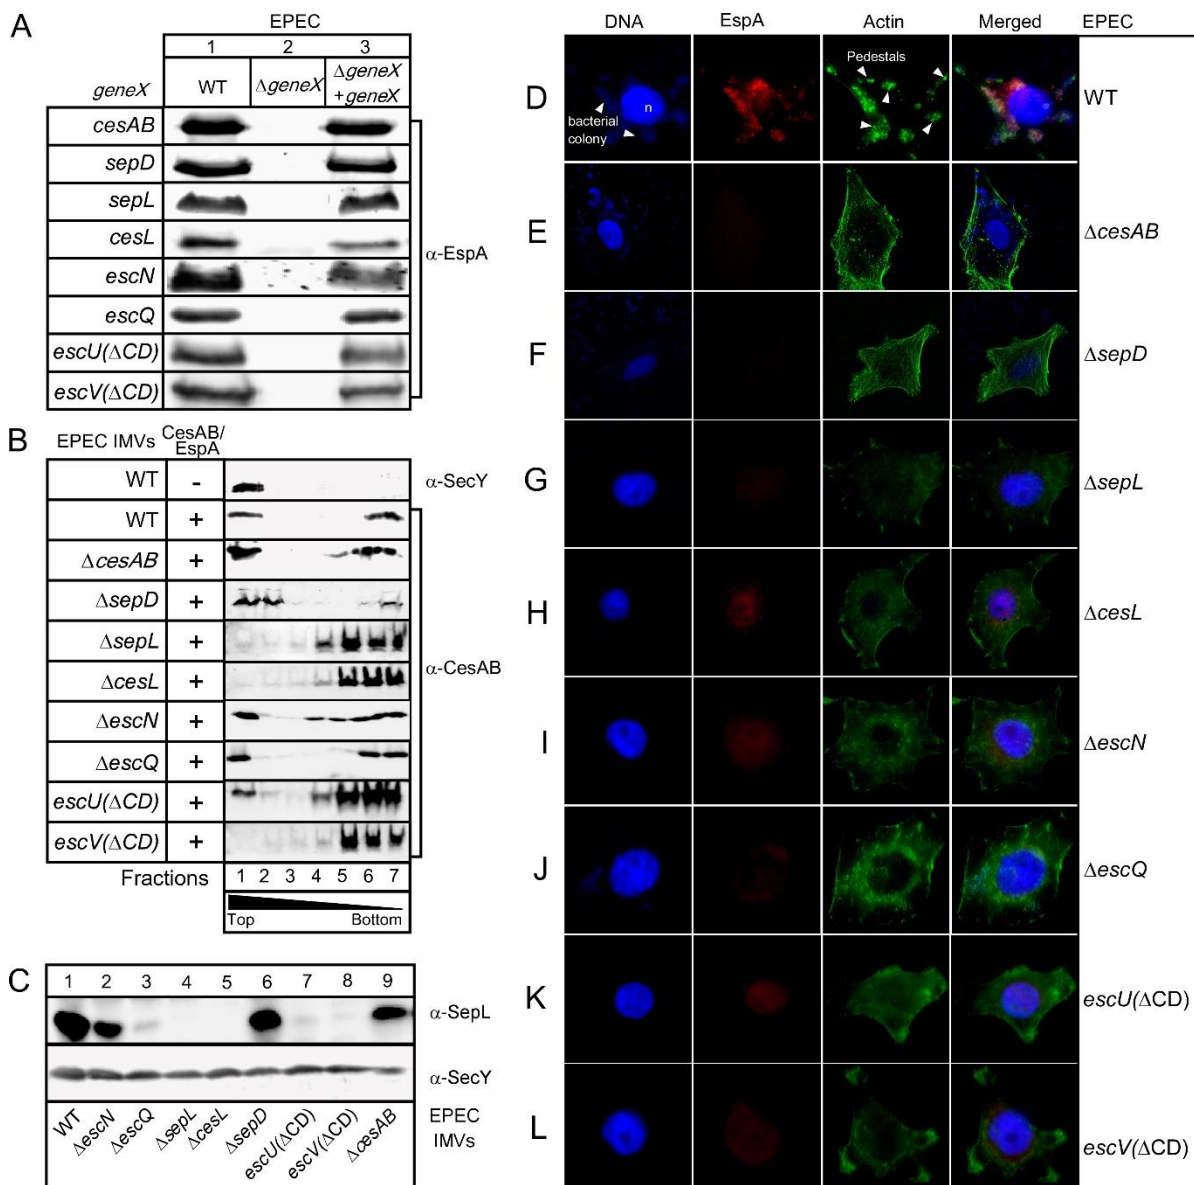

**Figure S1: T3SS elements required for CesAB/EspA membrane targeting (Related to Figure 3 and 6)**

**A.** The indicated EPEC gene knock out-strains ( $\Delta geneX$ ; lane 2) were tested for EspA secretion, under the same conditions with wild type EPEC (lane 1). 5 hours post-inoculation cells were separated from the spent growth medium (50 ml; 20 min; 3,000 x g; 4 °C) which was then TCA precipitated (20% w/v). TCA pellets were resuspended in volume adjusted according to OD<sub>600</sub> and proteins were analyzed on 15% SDS-PAGE. EspA secretion was monitored by immunostaining. Representative experiments are shown. None of these knock out-strains could secrete EspA (lane 2;  $\Delta geneX$ ). In all cases, EspA secretion was restored by complementing the deletion strain with a plasmid carrying the respected gene (lane 3;  $\Delta geneX + geneX$ ).  $n=3$ .

**B.** The ability of CesAB/EspA to bind to urea treated IMVs, prepared from the indicated EPEC knock out-strains, was examined using flotation assays (as in Fig. 2D). Representative experiments are shown. When the *sepL* “gatekeeper” or the cytoplasmic domain of EscV were deleted, the migration of CesAB/EspA to the top fractions was compromised. In the absence of CesL, a SepL chaperone (Younis et al, 2010), SepL was not detected on the IMVs (see panel C) hence, the inability of CesAB/EspA to bind on them.  $n=6-9$ .

**C.** SepL content on urea treated IMVs, prepared from wild type or the indicated EPEC deletion strain (20  $\mu$ gr total membrane protein) were analyzed on 15% SDS-PAGE and immunostained with  $\alpha$ -SepL. A representative experiment is shown. The presence of SepL on IMVs was highly correlated with the ability of CesAB/EspA to bind to them. The very low amounts of SepL that were detected in EPEC $\Delta$ *escQ* (lane 3) and *escU*( $\Delta$ CD) (lane 7) were sufficient for CesAB/EspA binding on IMVs, suggesting that there is no linear correlation between the two. Immunostaining of the membrane protein SecY (bottom panel) served as an unrelated loading control against which SepL values were adjusted before plotting them in Fig. 3D.  $n=3$ .

**D-L:** The indicated EPEC gene knock out-strains were tested for their ability to infect HeLa cells under the same conditions with wild type EPEC. Nucleus and bacterial DNA are indicated in blue (stained with DAPI; TO-PRO<sup>®</sup>-3; Thermo Fisher Scientific); secreted EspA in red (stained with Cy3  $\alpha$ -rabbit; Jacksons ImmunoResearch Europe Ltd); actin in green (stained with Cy2-Phalloidin; Thermo Fisher Scientific). A merged picture is shown on the right. Arrowheads indicate bacterial colonies and actin pedestals. For each EPEC knock-out strain a representative picture is shown. Unlike wild type EPEC, none of the indicated knock-out strains was able to infect HeLa cells.  $n=4$

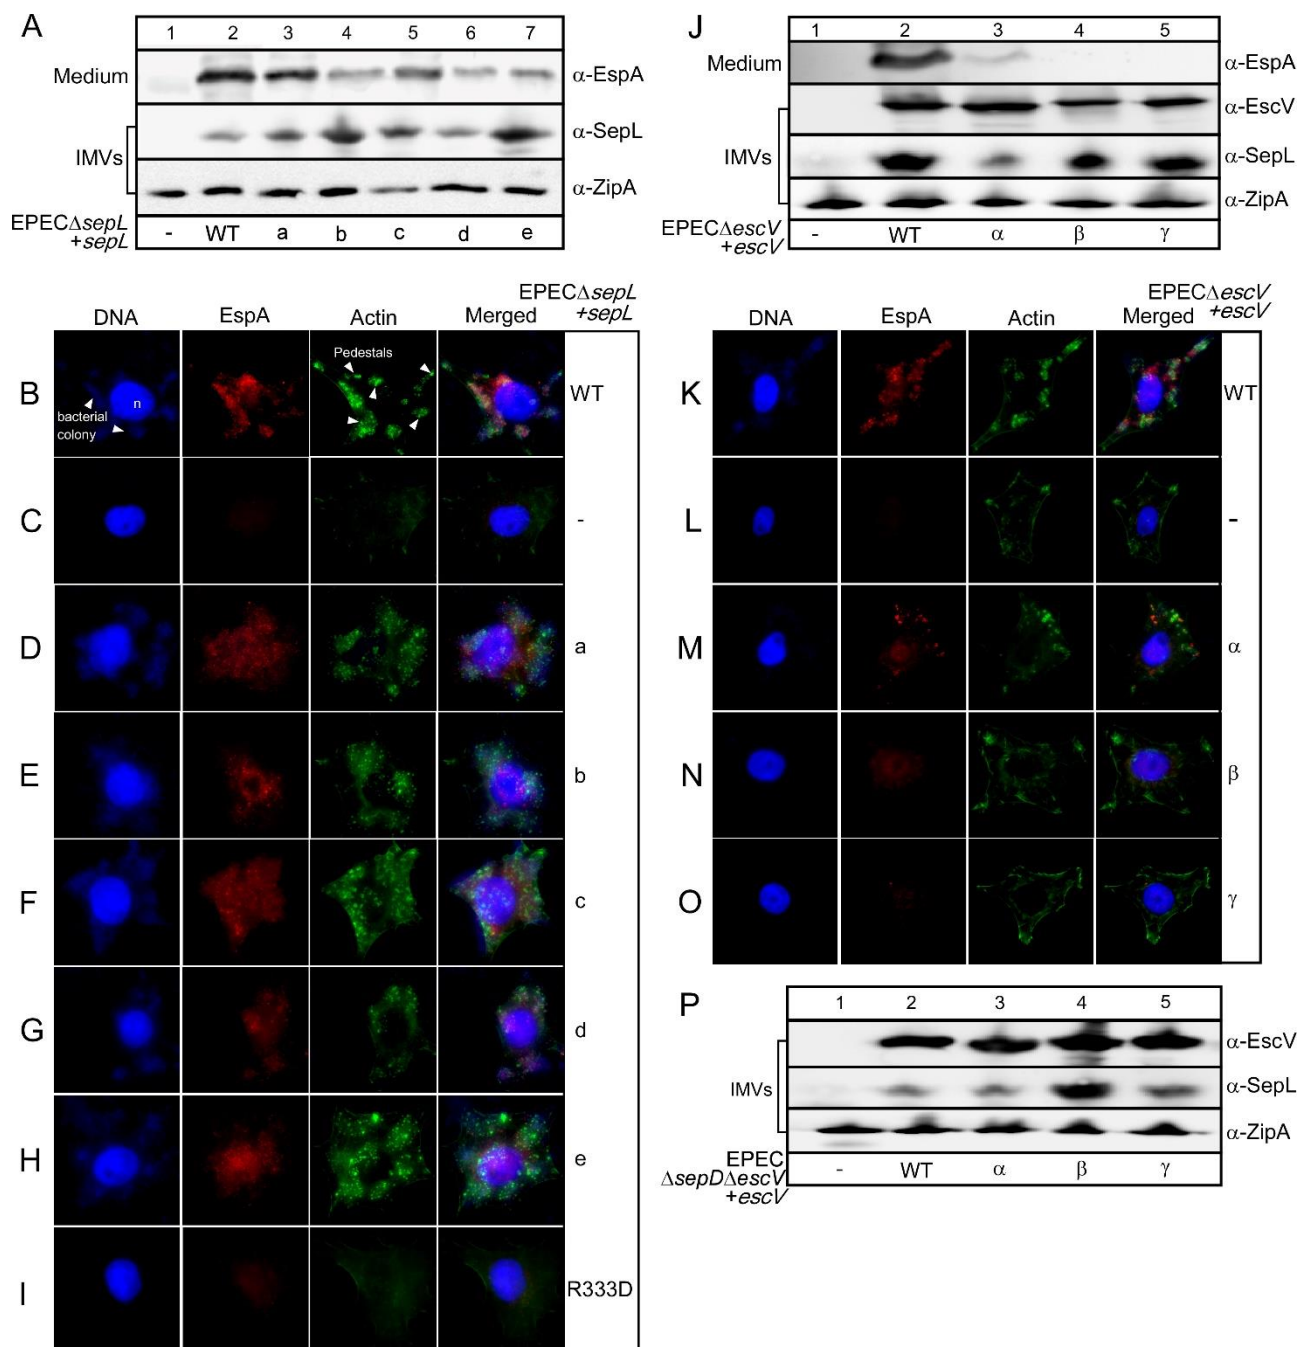

**Figure S2: *in vivo* characterization of SepL and EscV mutants (Related to Figures 4 and 6)**

**A.** EspA secretion (top; as in Fig. S3A), *sepL* membrane localization (IMVs; middle; as in Fig. S3C) in EPEC $\Delta$ sepL cells carrying a pASK-IBA7plus vector empty (lane 1), or with *sepL* (lane 2), or *sepL* mutant derivatives (lanes 3-7). Signals were quantified using Image J software (Schneider et al, 2012). Immunostaining of ZipA (bottom) served as an unrelated loading control against which SepL values were adjusted before plotting them in Fig. 4C. A representative experiment is shown.  $n=4$

**B-I.** Infection of HeLa cells by EPEC $\Delta$ sepL cells carrying a pASK-IBA7plus vector empty, or with the indicated *sepL* derivatives (without induction of plasmid gene expression). SepL R333D derivative was used as a negative control, as it has been proposed to affect translocator/chaperone binding (Botteaux et al, 2009; Burkinshaw et al, 2015). Nucleus and bacterial DNA are indicated in blue (stained with DAPI; TO-PRO $\text{\textcircled{R}}$ -3; Thermo Phisher Scientific); secreted EspA in red (stained with Cy3  $\alpha$ -rabbit; Jacksons Immuno-Research lab); actin in green (stained with Cy2-Phalloidin; Thermo Phisher Scientific). A merged picture is shown on the right. Arrowheads indicate bacterial colonies and actin pedestals. Representative pictures are shown.  $n=4$ .

**J.** EspA secretion (top panel; as in Fig. S3A), EscV membrane localization (IMVs; second panel; as in S3C after immunostaining with  $\alpha$ -EscV CD) and SepL membrane localization (IMVs; third panel; as in Fig. S3C) in EPEC $\Delta$ *escV* carrying a pASK-IBA7plus vector empty (lane 1), or with *escV* (lane 2), or with *escV* mutant derivatives (lanes 3-5). *escV* mutants restored EscV localization on IMVs but either could not or could barely secrete EspA. SepL localization on those IMVs was also slightly affected. Immunostaining of ZipA (bottom panel) served as an unrelated loading control against which SepL values were adjusted before plotting them in Fig. 4F. A representative experiment is shown.  $n=4$

**K-O.** Infection of HeLa cells by EPEC $\Delta$ *escV* cells carrying a pASK-IBA7plus vector empty or with the indicated *escV* derivatives, as in panel B.  $n=3$

**P.** EscV (IMVs; top panel; as in panel J) and SepL membrane localization (IMVs; middle panel; as in Fig. S3C) in EPEC $\Delta$ *escV* $\Delta$ *sepD* carrying a pASK-IBA7plus vector empty (lane 1), or with *escV* (lane 2), or with *escV* mutant derivatives (lanes 3-5). *escV* mutants restored EscV localization on IMVs. SepL localization on those IMVs was slightly affected. Immunostaining of ZipA (bottom panel) served as an unrelated loading control against which SepL values were adjusted before plotting them in Fig. 4H. A representative experiment is shown.  $n=4$

**Supplementary tables:**

**Table S1: Hydrogen/Deuterium exchange profile of CesAB (Related to Figure 1).** The deuterium (D) uptake, absolute values and relative to the complete deuteration control, is given for all identified peptides of the CesAB sequence (98% sequence coverage) for CesAB, CesAB/EspA and CesAB(DRE), as indicated. The overlapping peptides indicated by hashtag (#) were used for the D uptake determination of the sequence residues 59-62, for higher resolution localization of D uptake at this region. D uptake of peptides with mutated sequences (residues in red) were not compared (-).

| Identified CesAB peptides |     |                                              | Absolute D uptake    |           |            |             | % D uptake (relative to complete deuteration) |            |             |
|---------------------------|-----|----------------------------------------------|----------------------|-----------|------------|-------------|-----------------------------------------------|------------|-------------|
| Start                     | End | Sequence                                     | Complete deuteration | CesAB     | CesAB/EspA | CesAB (DRE) | CesAB                                         | CesAB/EspA | CesAB (DRE) |
| 3                         | 23  | IVSQTRNKELLDKKIRSEIEA                        | 12.204945            | 5.972235  | 2.889644   | -           | 48.9%                                         | 23.7%      | -           |
| 23                        | 30  | AIKKIIAE                                     | 4.691717             | 0.45995   | 0.34798    | 0.190344    | 9.8%                                          | 7.4%       | 4.1%        |
| 23                        | 31  | AIKKIIAEF                                    | 5.54809              | 0.546953  | 0.414805   | 0.186649    | 9.9%                                          | 7.5%       | 3.4%        |
| 24                        | 30  | IKKIIAE                                      | 3.808228             | 0.353473  | 0.26307    | 0.16863     | 9.3%                                          | 6.9%       | 4.4%        |
| 24                        | 31  | IKKIIAEF                                     | 4.121063             | 0.472674  | 0.375524   | 0.239781    | 11.5%                                         | 9.1%       | 5.8%        |
| 31                        | 40  | FDVVKESVNE                                   | 5.805299             | 2.258135  | 0.840623   | 0.648278    | 38.9%                                         | 14.5%      | 11.2%       |
| 31                        | 41  | FDVVKESVNEL                                  | 7.208374             | 2.639588  | 0.839591   | 0.725584    | 36.6%                                         | 11.6%      | 10.1%       |
| 31                        | 58  | FDVVKESVNELSEKAKTDPQAAEKLNLK                 | 20.711527            | 7.266918  | 2.411325   | 2.429544    | 35.1%                                         | 11.6%      | 11.7%       |
| 32                        | 40  | DVVKESVNE                                    | 4.998914             | 2.102245  | 0.615076   | 0.593526    | 42.1%                                         | 12.3%      | 11.9%       |
| 32                        | 58  | DVVKESVNELSEKAKTDPQAAEKLNLK                  | 19.99834             | 7.144325  | 2.239756   | 2.408962    | 35.7%                                         | 11.2%      | 12.0%       |
| 32                        | 61  | DVVKESVNELSEKAKTDPQAAEKLNLKIEG               | 22.482801            | 7.965473  | 3.292445   | 2.738683    | 35.4%                                         | 14.6%      | 12.2%       |
| 32                        | 75  | DVVKESVNELSEKAKTDPQAAEKLNLKIEGYTYGEERKLYDSAL | 34.398828            | 13.800839 | 3.705901   | 5.308861    | 40.1%                                         | 10.8%      | 15.4%       |
| 41                        | 58  | LSEKAKTDPQAAEKLNLK                           | 10.676177            | 3.535546  | 1.355372   | 1.415413    | 33.1%                                         | 12.7%      | 13.3%       |
| 41                        | 61  | LSEKAKTDPQAAEKLNLKIEG                        | 12.891826            | 4.148516  | 1.744197   | 1.587595    | 32.2%                                         | 13.5%      | 12.3%       |
| 41                        | 75  | LSEKAKTDPQAAEKLNLKIEGYTYGEERKLYDSAL          | 24.287387            | 9.908216  | 2.87125    | 4.040528    | 40.8%                                         | 11.8%      | 16.6%       |
| 42                        | 58  | SEKAKTDPQAAEKLNLK                            | 10.144713            | 3.141387  | 1.048611   | 1.274797    | 31.0%                                         | 10.3%      | 12.6%       |
| 56                        | 63  | NKLIEGYT                                     | 1.344411             | 0.720293  | 1.02296    | 0.910831    | 53.6%                                         | 76.1%      | 67.7%       |
| #59                       | 75  | IEGYTYGEERKLYDSAL                            | 10.2792              | 5.153114  | 1.24488    | 2.329313    | 50.1%                                         | 12.1%      | 22.7%       |
| #62                       | 75  | YTYGEERKLYDSAL                               | 8.322433             | 3.907156  | 1.011225   | 2.061401    | 46.9%                                         | 12.2%      | 24.8%       |
| 68                        | 75  | RKLYDSAL                                     | 3.826801             | 1.544169  | 0.411798   | 0.833902    | 40.4%                                         | 10.8%      | 21.8%       |
| 76                        | 83  | SKIEKLIE                                     | 4.757447             | 0.606036  | 0.325324   | 0.218148    | 12.7%                                         | 6.8%       | 4.6%        |
| 82                        | 107 | IETLSPARSKSQSTMNQRNRNRKIV                    | 14.805574            | 12.86523  | 12.098505  | 11.930598   | 86.9%                                         | 81.7%      | 80.6%       |

**Table S2: T3SS proteins identified by LC-MS/MS (Related to Fig. 2).** T3SS proteins present on isolated WT EPEC IMVs detected by LC-MS/MS in various surface proteolysis experiments. 33 LEE-encoded proteins and 5 non-LEE effectors have been detected with medium or high confidence scores (see Supplementary Methods). For each protein, the number of IMV preparations out of the total in which it was detected is indicated (as a percentage; green: 70-100%; orange; 35-70%; red < 35%). The number of peptides used for the comparison in Fig. 2C is shown. Non-detected proteins are marked with (-).

| Structural sub-assembly | Subunit function/role             | T3SS common nomenclature | EPEC protein nomenclature | Uniprot Accession number | Confidence of identification | Total number of peptides detected | % of IMV preparations in which this protein was detected | No. peptides used for Urea vs Non-urea IMVs comparison |
|-------------------------|-----------------------------------|--------------------------|---------------------------|--------------------------|------------------------------|-----------------------------------|----------------------------------------------------------|--------------------------------------------------------|
| Translocators           | Translocator                      | SctB                     | EspB                      | Q05129                   | High                         | 33                                |                                                          | 17                                                     |
|                         | Translocator                      | SctE                     | EspD                      | B7UM93                   | High                         | 22                                |                                                          | 13                                                     |
|                         | Translocator                      | SctA                     | EspA                      | B7UM94                   | High                         | 10                                |                                                          | 10                                                     |
| Needle                  | Needle component                  | SctF                     | EscF                      | B7UM90                   | High                         | 4                                 |                                                          | 1                                                      |
| OM ring                 | Secretin                          | SctC                     | EscC                      | B7UMB3                   | High                         | 13                                |                                                          | 13                                                     |
| OM-IM connector         | Inner rod                         | SctI                     | EscI                      | B7UMB0                   | -                            | -                                 |                                                          | -                                                      |
| IM ring                 | Lipoprotein ring component        | SctJ                     | EscJ                      | B7UMB1                   | High                         | 7                                 |                                                          | 7                                                      |
|                         | Major IM ring component           | SctD                     | EscD                      | B7UM96                   | High                         | 22                                |                                                          | 17                                                     |
| Export apparatus        | Translocase channel               | SctR                     | EscR                      | B7UMC1                   | -                            | -                                 |                                                          | -                                                      |
|                         | Translocase channel               | SctS                     | EscS                      | B7UMC0                   | -                            | -                                 |                                                          | -                                                      |
|                         | Translocase channel               | SctT                     | EscT                      | B7UMB9                   | -                            | -                                 |                                                          | -                                                      |
|                         | Minor component, external channel | SctU                     | EscU                      | B7UMB8                   | High                         | 7                                 |                                                          | 1                                                      |
|                         | Major component, external channel | SctV                     | EscV                      | B7UMA7                   | High                         | 21                                |                                                          | 18                                                     |
| Cytoplasmic ring        | Component of 6-pod assembly       | SctQ                     | EscQ                      | B7UMA3                   | Medium                       | 1                                 |                                                          |                                                        |
|                         | Connector of 6-pod with EscD      | SctK                     | EscK                      | B7UMC3                   | High                         | 11                                |                                                          | 9                                                      |



|                     |                                                        |      |       |        |      |    |  |    |
|---------------------|--------------------------------------------------------|------|-------|--------|------|----|--|----|
| ATPase complex      | External Stator connecting ATPase and Cytoplasmic ring | SctL | EscL  | B7UMC2 | High | 6  |  |    |
|                     | Hexameric ring-structure ATPase                        | SctN | EscN  | B7UMA6 | High | 4  |  | 2  |
|                     | Central stalk, inserting in ATPase ring                | SctO | EscO  | B7UMA5 | -    | -  |  | -  |
| Assembly regulators | Molecular ruler regulating needle/filament length      | SctP | EscP  | B7UMA4 | High | 5  |  | 5  |
| Gatekeeper          | Gatekeeper/Affinity switch                             | SctW | SepL  | B7UM95 | High | 14 |  | 10 |
|                     | Subunit 1 of SctW chaperone heterodimer                |      | SepD  | B7UMB2 | High | 1  |  | 1  |
|                     | Subunit 2 of SctW chaperone heterodimer                |      | CesL  | B7UMA8 | High | 3  |  | 4  |
| Chaperones          | For early substrates (EscF)                            |      | EscG  | B7UM89 | High |    |  |    |
|                     | For early substrates (EscF)                            |      | EscE  | B7UMC5 | -    | -  |  | -  |
|                     | For middle substrates (translocators)                  |      | CesAB | B7UMC4 | High | 4  |  | 3  |
|                     | For middle substrates (translocators)                  |      | CesD  | B7UMB4 | High | 7  |  | 4  |
|                     | For middle substrates (translocators)                  |      | CesD2 | B7UM91 | High | 9  |  | 9  |
|                     | For late substrates (effectors)                        |      | CesT  | P21244 | High | 7  |  | 6  |
|                     | For late substrates (effectors)                        |      | CesF  | B7UMA1 | High | 6  |  | 6  |

|                                     |                                                |         |        |        |        |    |    |    |
|-------------------------------------|------------------------------------------------|---------|--------|--------|--------|----|----|----|
| Transcription regulators            | Global regulators                              |         | Ler    | B7UMC6 | High   | 1  |    | 1  |
|                                     | negative regulators                            |         | grIR   | B7UMB6 | Medium | 2  |    |    |
|                                     | Positive regulators                            |         | grIA   | B7UMB5 | High   | 2  |    | 2  |
|                                     | Histone-like nucleoid-like structuring protein |         | H-NS   | B7UQC9 | -      | -  |    | -  |
| Muramidase                          |                                                | etgA    | B7UMB7 | -      | -      |    | -  |    |
| Attachment receptor                 |                                                | Intimin | P19809 | High   | 53     |    | 43 |    |
| Secreted effector (LEE encoded)     |                                                |         | Tir    | B7UM99 | High   | 30 |    | 21 |
|                                     |                                                |         | Map    | B7UMA0 | High   | 11 |    | 8  |
|                                     |                                                |         | EspZ   | B7UMA9 | High   | 2  |    | -  |
|                                     |                                                |         | EspF   | B7UM88 | High   | 9  |    | 9  |
|                                     |                                                |         | EspG   | B7UMC8 | High   | 16 |    | 12 |
|                                     |                                                |         | EspJ   | B7UMB1 | High   | 6  |    | -  |
|                                     |                                                |         | EspH   | B7UMA2 | -      |    |    | -  |
| Secreted effector (non-LEE encoded) |                                                |         | EspL   | B7UI20 | High   | 5  |    | -  |
|                                     |                                                |         | NleA   | B7UR60 | High   | 2  |    | -  |
|                                     |                                                |         | NleB2  | B7UI21 | High   | 6  |    | -  |
|                                     |                                                |         | NleE1  | B7UI22 | High   | 3  |    | -  |
|                                     |                                                |         | NleI   | B7UNX2 | High   | 1  |    | -  |

## Supplementary Materials and methods

### Buffers

|                           |                                                                                                                     |
|---------------------------|---------------------------------------------------------------------------------------------------------------------|
| <b>Buffer A</b>           | 50mM Tris/HCl pH 8.0; 50mM NaCl                                                                                     |
| <b>Buffer B</b>           | 50mM Tris/HCl pH 8.0; 50mM NaCl; 50% Glycerol                                                                       |
| <b>Buffer C</b>           | 50mM Tris/HCl pH 8.0; 50mM KCl; 5mM MgCl <sub>2</sub>                                                               |
| <b>Buffer D</b>           | 50mM HEPES pH:7.5; 50mM KCl; 5mM MgCl <sub>2</sub> ; 5% glycerol                                                    |
| <b>Buffer E</b>           | 50mM HEPES-KOH pH 6.6; 50mM KCl                                                                                     |
| <b>Buffer F</b>           | 50mM Tris/HCl pH 8.0; 20% Glycerol                                                                                  |
| <b>1X PBS</b>             | 137mM NaCl <sub>2</sub> ; 2.7mM KCl; 4.3mM Na <sub>2</sub> HPO <sub>4</sub> ; 1.4mM KH <sub>2</sub> PO <sub>4</sub> |
| <b>Rehydration buffer</b> | 8M urea; 2% Triton; 2% IPG Buffer; 40mM DTT; 1% Bromophenol Blue                                                    |

### Antisera

Rabbit polyclonal antibodies against the indicated purified proteins, or protein domains, were raised by Davids Biotechnologie, Germany. T3SS antibodies were further purified by 9 cycles of negative immuno-absorption, using membranes isolated from *EPEC* strains that lacked the gene of interest, i.e. for  $\alpha$ -CesAB, membranes isolated from *EPEC* $\Delta$ *cesAB* cells were used.

| <b>Protein-antigen</b>  | <b>Animal Source</b> | <b>Reference or commercial source</b>   |
|-------------------------|----------------------|-----------------------------------------|
| CesAB                   | Rabbit               | (Chen et al, 2011; Creasey et al, 2003) |
| EspA                    | Rabbit               | (Chen et al, 2011; Creasey et al, 2003) |
| SepL                    | Rabbit               | This study                              |
| EscV Cytoplasmic domain | Rabbit               | This study                              |
| CesF                    | Rabbit               | This study                              |
| Tir                     | Rabbit               | This study                              |
| MBP                     | Rabbit               | This study                              |
| SecY                    | Rabbit               | (Karamanou et al, 2008)                 |
| SecA                    | Rabbit               | (Karamanou et al, 2008)                 |
| SecB                    | Rabbit               | This study                              |
| OmpA                    | Rabbit               | This study                              |
| PhoA                    | Rabbit               | (Gouridis et al, 2009)                  |
| ZipA                    | Rabbit               | This study                              |
| $\alpha$ -Rabbit        | Goat                 | Jackson ImmunoResearch Europe Ltd       |
| $\alpha$ -Mouse         | Goat                 | Jackson ImmunoResearch Europe Ltd       |
| $\alpha$ -His           | Mouse                | SEROTEC                                 |

|                           |      |                                             |
|---------------------------|------|---------------------------------------------|
| $\alpha$ -Rabbit 5nm GOLD | Goat | British Biocell International (Cardiff, UK) |
|---------------------------|------|---------------------------------------------|

### Dyes and labeled secondary antibodies

| Dyes/labelled secondary antibodies             | Commercial source            |
|------------------------------------------------|------------------------------|
| Cy <sup>TM</sup> 3-Affinipure $\alpha$ -Rabbit | Jacksons Immuno-Research Lab |
| Cy2 Oregon Green@4889 Phalloidin               | Thermo Fisher Scientific     |
| TO-PRO@-3                                      | Thermo Fisher Scientific     |
| DAPI                                           | Thermo Fisher Scientific     |

### Vectors

| Vector name        | Antibiotic resistance | Origin           | Reference                                                                                                                                                                                                                          |
|--------------------|-----------------------|------------------|------------------------------------------------------------------------------------------------------------------------------------------------------------------------------------------------------------------------------------|
| pASKIBA7 plus      | Ampicillin            | pBR322           | IBA life sciences ( <a href="http://www.iba-lifesciences.com/isotope/2/2-1406-000-DS-2-1406-000-pASK-IBA7plus.pdf">http://www.iba-lifesciences.com/isotope/2/2-1406-000-DS-2-1406-000-pASK-IBA7plus.pdf</a> ) (Guzman et al, 1995) |
| pET Duet 1         | Ampicillin            | pBR322           | Novagen                                                                                                                                                                                                                            |
| pKD4               | Kanamycin             | R6K $\gamma$     | (Datsenko & Wanner, 2000)                                                                                                                                                                                                          |
| pKD3               | Chloramphenicol       | R6K $\gamma$     | (Datsenko & Wanner, 2000)                                                                                                                                                                                                          |
| pKD46              | Ampicillin            | R101 w/repA101ts | (Datsenko & Wanner, 2000)                                                                                                                                                                                                          |
| pET 16B            | Ampicillin            | pBR322           | Novagen                                                                                                                                                                                                                            |
| pET 22B            | Ampicillin            | pBR322           | Novagen                                                                                                                                                                                                                            |
| pMAL-c2X           | Ampicillin            | pBR322           | New England Biolabs                                                                                                                                                                                                                |
| pET16B His-MBP-TEV | Ampicillin            | pBR322           | This study                                                                                                                                                                                                                         |

### Genetic constructs

Genes were cloned in the indicated plasmid vectors using a combination of restriction sites (as indicated). Gene-mutations were introduced by following the Quick Change Site-Directed Mutagenesis protocol (Stratagene-Agilent); templates and primers were as indicated. Restriction enzymes and T4 DNA Ligase were either from Minotech (Greece), or Promega, or NEB. For PCR mutagenesis PFU Ultra Polymerase (Stratagene) was used; for gene amplification either Expand High fidelity Polymerase (Roche) or DNA *Taq* polymerase (Thermo scientific). *DpnI* was used to cleave the maternal methylated DNA (NEB). All PCR-generated plasmids were sequenced (Macrogen Europe). Plasmids were stored in DH5 $\alpha$  cells.

| Gene                                        | Uniprot KB accession | Plasmid name | Vector        | Cloning/PCR strategy or source                                                                                                                                                          |
|---------------------------------------------|----------------------|--------------|---------------|-----------------------------------------------------------------------------------------------------------------------------------------------------------------------------------------|
| <b>Chaperones and exported proteins</b>     |                      |              |               |                                                                                                                                                                                         |
| <i>cesAB</i>                                | B7UMC4               | pIMBB585     | pETDuet-1     | The <i>cesAB</i> gene, was amplified from EPEC strain E2348/69 using primers X345 and X346, digested with BamHI-HindIII and cloned in pETDuet-1.                                        |
| <i>cesAB</i> and <i>espA</i>                | B7UMC4 and B7UM94    | pIMBB648     | pETDuet-1     | The <i>espA</i> gene was amplified from EPEC strain E2348/69 using primers X375 and X376, digested with MunI-KpnI and cloned in pIMBB585.                                               |
| <i>cesAB</i> ( $\Delta C$ ) and <i>espA</i> | B7UMC4 and B7UM94    | pIMBB803     | pETDuet-1     | The <i>cesAB</i> (N1-86) fragment was amplified from EPEC strain E2348/69 using primers X345 and X431, digested with BamHI-HindIII and cloned in pIMBB648 instead of <i>cesAB</i> gene. |
| <i>cesAB</i> and <i>espA</i>                | B7UMC4 and B7UM94    | pIMBB1289    | pASK-IBA7plus | The <i>espA</i> gene was amplified from pIMBB648 using primers X1018 and X1019, digested with HindIII-HindIII and cloned in pIMBB806. Primer X1018 inserts an RBS.                      |
| <i>cesAB</i> ( $\Delta C$ ) and <i>espA</i> | B7UMC4 and B7UM94    | pLMB1792     | pASK-IBA7plus | The <i>espA</i> gene was digested from pIMBB1289 using HindIII-HindIII and cloned in pIMBB807                                                                                           |
| <i>cesAB</i> ( $\Delta C$ )                 | B7UMC4               | pIMBB801     | pETDuet-1     | The <i>cesAB</i> (N1-86) fragment was amplified from EPEC strain E2348/69 using primers X345 and X431, digested with BamHI-HindIII and cloned in pETDuet-1.                             |
| <i>cesAB</i>                                | B7UMC4               | pIMBB806     | pASK-IBA7plus | The <i>cesAB</i> gene was amplified from pIMBB585 using primers X453 and X346, digested with NheI-HindIII and cloned in pASK-IBA7plus.                                                  |
| <i>cesAB</i> ( $\Delta C$ )                 | B7UMC4               | pIMBB807     | pASK-IBA7plus | The <i>cesAB</i> (N1-86) fragment was amplified from pIMBB585 using primers X453 and X431, digested with NheI-HindIII and cloned in pASK-IBA7plus                                       |

|                                           |                           |           |               |                                                                                                                                                               |
|-------------------------------------------|---------------------------|-----------|---------------|---------------------------------------------------------------------------------------------------------------------------------------------------------------|
| <i>cesAB(6A)</i>                          | B7UMC4                    | pIMBB1413 | pASK-IBA7plus | The 6 mutations (R89A, K91A, R99A, R101A, R104A, K105A) in pIMBB806 were introduced sequentially using primer pairs X1221-X1222, X1223-X1224 and X1225-X1226. |
| <i>cesAB(DRE)</i>                         | B7UMC4                    | pIMBB1287 | pETDuet-1     | The mutations <i>D14L</i> , <i>R18D</i> and <i>E20L</i> were introduced in pIMBB585 using primer pairs X954-X955, X958-X959 and X1000-X1001.                  |
| <i>cesAB(DRE)</i>                         | B7UMC4                    | pIMBB1294 | pASK-IBA7plus | The <i>cesAB(D14L/R18D/E20L)</i> gene was digested from pIMBB1287 using BamHI-HindIII and cloned in pASKIBA7plus vector.                                      |
| <i>cesAB(DRE/ΔC)</i>                      | B7UMC4                    | pLMB0006  | pETDuet-1     | The <i>cesAB(D14L/R18D/E20L)</i> (N1-86) was amplified from pIMBB1287 using primers X1442 and X431, digested with NcoI-HindIII and inserted in pETDuet-1.     |
| <i>cesT</i>                               | P21244                    | pIMBB1157 | pETDuet-1     | The <i>cesT</i> gene was amplified from EPEC strain E2348/69 using primers X865 and X866, digested with BamHI-HindIII and cloned in pETDuet-1.                |
| <i>cesT</i> and <i>tir</i>                | P21244 and B7UM99         | pIMBB1158 | pETDuet-1     | The <i>tir</i> gene was amplified from EPEC strain E2348/69 using primers X867 and X868, digested with MfeI-KpnI and cloned in pIMBB1157.                     |
| <b>SepL-related constructs</b>            |                           |           |               |                                                                                                                                                               |
| <i>sepL</i>                               | B7UM95                    | pIMBB1189 | pET 16B       | The <i>sepL</i> gene was amplified from EPEC strain E2348/69 using primers X980 and X981, digested with NdeI-XhoI and cloned in pET 16B.                      |
| <i>sepD</i>                               | B7UMB2                    | pIMBB1188 | pET 16B       | The <i>sepD</i> gene was amplified from EPEC strain E2348/69 using primers X978 and X979, digested with NdeI-XhoI and cloned in pET 16B.                      |
| <i>cesL</i>                               | B7UMA8                    | pIMBB1549 | pETDuet-1     | The <i>cesL</i> gene was amplified from EPEC strain E2348/69 using primers X1730 and X1731 digested with BamHI-SalI and cloned in pETDuet-1.                  |
| <i>cesL</i>                               | B7UMA8                    | pLMB1821  | pASK-IBA7plus | The <i>cesL</i> gene was amplified from EPEC strain E2348/69 using primers X2068 and X1731 digested with NheI-SalI and cloned in pASK-IBA7plus.               |
| <i>cesL</i> and <i>sepD</i>               | B7UMA8 and B7UMB2         | pIMBB1547 | pETDuet-1     | The <i>sepD</i> gene was amplified from EPEC strain E2348/69 using primers X1732 and X1733, digested with SalI-HindIII and cloned in pIMBB1549.               |
| <i>cesL</i> , <i>sepD</i> and <i>sepL</i> | B7UMA8, B7UMB2 and B7UM95 | pIMBB1548 | pETDuet-1     | The <i>sepL</i> gene was digested from pIMBB1189 using NdeI-XhoI and cloned in pIMBB1547.                                                                     |

|                                                    |        |           |               |                                                                                                                                               |
|----------------------------------------------------|--------|-----------|---------------|-----------------------------------------------------------------------------------------------------------------------------------------------|
| His- <i>sepL</i>                                   | B7UM95 | pIMBB1305 | pASK-IBA7plus | The <i>sepL</i> gene was digested from pIMBB1189 using XbaI-XhoI and cloned in pASKIBA7plus.                                                  |
| His- <i>sepD</i>                                   | B7UMB2 | pIMBB1304 | pASK-IBA7plus | The <i>sepD</i> gene was digested from pIMBB1188 using XbaI-XhoI and cloned in pASKIBA7plus.                                                  |
| <i>sepL</i> (R333D)                                | B7UM95 | pIMBB1543 | pASK-IBA7plus | The mutation R333D was introduced in pIMBB1305 using primers X1735 and X1736.                                                                 |
| <i>sepL</i> (N1-241)                               | B7UM95 | pIMBB1541 | pET 16B       | The <i>sepL</i> fragment was amplified from EPEC strain E2348/69 using primers X980 and X1737, digested with NdeI-XhoI and cloned in pET 16B. |
| <i>sepL</i> N1-278                                 | B7UM95 | pIMBB1542 | pET 16B       | The <i>sepL</i> fragment was amplified from EPEC strain E2348/69 using primers X980 and X1738, digested with NdeI-XhoI and cloned in pET 16B. |
| <i>sepL</i> N124-351                               | B7UM95 | pIMBB1540 | pET 16B       | The <i>sepL</i> fragment was amplified from EPEC strain E2348/69 using primers X1734 and X981, digested with NdeI-XhoI and cloned in pET 16B. |
| His- <i>sepL</i> N1-241                            | B7UM95 | pLMB0090  | pASK-IBA7plus | The <i>sepL</i> fragment was digested from pIMBB1541 using XbaI-XhoI and cloned in pASKIBA7plus.                                              |
| His- <i>sepL</i> N1-278                            | B7UM95 | pLMB0089  | pASK-IBA7plus | The <i>sepL</i> fragment was digested from pIMBB1542 using XbaI-XhoI and cloned in pASK-IBA7plus.                                             |
| His- <i>sepL</i> N124-351                          | B7UM95 | pLMB0091  | pASK-IBA7plus | The <i>sepL</i> fragment was digested from pIMBB1540 using XbaI-XhoI and cloned in pASK-IBA7plus.                                             |
| <i>sepL</i> patch a                                | B7UM95 | pLMB1755  | pASK-IBA7plus | The synthetic gene fragment from pUC47 <i>sepL</i> Patch a was digested with XbaI-HindIII and cloned in pIMBB1305.                            |
| <i>sepL</i> patch b                                | B7UM95 | pLMB1756  | pASK-IBA7plus | The synthetic gene fragment from pUC47 <i>sepL</i> Patch b was digested with XbaI-HindIII and cloned in pIMBB1305.                            |
| <i>sepL</i> patch c                                | B7UM95 | pLMB1757  | pASK-IBA7plus | The synthetic gene fragment from pUC47 <i>sepL</i> Patch c was digested with HindIII-XhoI and cloned in pIMBB1305.                            |
| <i>sepL</i> patch d                                | B7UM95 | pLMB1758  | pASK-IBA7plus | The synthetic gene fragment from pUC47 <i>sepL</i> Patch d was digested with HindIII-XhoI and cloned in pIMBB1305.                            |
| <i>sepL</i> patch e                                | B7UM95 | pLMB1759  | pASK-IBA7plus | The synthetic gene fragment from pUC47 <i>sepL</i> Patch e was digested with HindIII-XhoI and cloned in pIMBB1305.                            |
| <b>Major export apparatus component constructs</b> |        |           |               |                                                                                                                                               |

|                                                                               |        |           |                     |                                                                                                                                                                                                                                                                    |
|-------------------------------------------------------------------------------|--------|-----------|---------------------|--------------------------------------------------------------------------------------------------------------------------------------------------------------------------------------------------------------------------------------------------------------------|
| <i>escV</i>                                                                   | B7UMA7 | pLMB0088  | pASK-IBA7plus       | The <i>escV</i> gene was amplified from EPEC strain E2348/69 using primers X1814 and X1710, digested with NheI –XhoI and cloned in pASK-IBA7plus.                                                                                                                  |
| <i>escV patch α</i>                                                           | B7UMA7 | pLMB1762  | pASK-IBA7plus       | The synthetic gene fragment from pUC47 <i>escV Patch α</i> was isolated by NheI-HindIII digestion and inserted in pLMB0088.                                                                                                                                        |
| <i>escV patch β</i>                                                           | B7UMA7 | pLMB1763  | pASK-IBA7plus       | The synthetic gene fragment from pUC47 <i>escV β</i> was digested with NheI-HindIII and inserted in pLMB0088.                                                                                                                                                      |
| <i>escV patch γ</i>                                                           | B7UMA7 | pLMB1764  | pASK-IBA7plus       | The synthetic gene fragment from pUC47 <i>escV γ</i> was digested with HindIII-XhoI and inserted in pLMB0088.                                                                                                                                                      |
| <b>Constructs for protein purification and <i>in vivo</i> complementation</b> |        |           |                     |                                                                                                                                                                                                                                                                    |
| <i>escV(Δ21-509)</i>                                                          | B7UMA7 | pIMBB1459 | pETDuet-1           | The N1-20 and the N510-676 domains of EscV were amplified from EPEC strain E2348/69 using the primer pairs X1278-X1279 and X1280-X1281. The N1-20 product was digested with BamHI-PstI and the N510-676 by PstI-HindIII and were cloned sequentially in pETDuet-1. |
| <i>espA</i>                                                                   | B7UM94 | pIMBB485  | pET 16B             | The <i>espA</i> gene was amplified from EPEC strain E2348/69 using primers X258 and X259, digested with NdeI-BamHI and cloned in pET 16B.                                                                                                                          |
| <i>cesF</i>                                                                   | B7UMA1 | pIMBB664  | pETDuet-1           | The <i>cesF</i> gene was amplified from EPEC strain E2348/69 using primers X379 and X380, digested with BamHI-SalI and cloned in pETDuet-1.                                                                                                                        |
| <i>Tir</i>                                                                    | B7UM99 | pIMBB1448 | pETDuet-1           | The <i>tir</i> gene was amplified from EPEC strain E2348/69 using primers X1265 and X897, digested with BamHI-HindIII and cloned in pETDuet-1.                                                                                                                     |
| His- <i>mbp</i> -TEV                                                          | P0AEX9 | pIMBB491  | pET 16B             | The <i>mbp</i> gene was amplified from pMAL-c2X using primers X239 and X240, digested with BamHI-HindIII and cloned in pETDuet-1.                                                                                                                                  |
| His- <i>mbp</i> -TEV- <i>sepL</i>                                             | B7UM95 | pIMBB1191 | pET 16B His MBP TEV | The <i>sepL</i> gene was amplified from EPEC strain E2348/69 using primers X980 and X981, digested with NdeI-XhoI and cloned in pET16B-MBP-TEV.                                                                                                                    |
| <i>escV(N334-675)</i>                                                         | B7UMA7 | pLMB1676  | pET 16B             | The <i>escV</i> gene was amplified from EPEC strain E2348/69 using primers X1850 and X1710, digested with NdeI-XhoI and cloned in pET 16B.                                                                                                                         |
| His- <i>mbp</i> -TEV- <i>escVCD</i>                                           | B7UMA7 | pLMB1643  | pET 16B - MBP-TEV   | The <i>escV</i> C-terminal domain (N334-675) fragment was digested with NdeI- XhoI from pLMB1676 and inserted in pIMBB1191.                                                                                                                                        |
| His- <i>secA</i>                                                              | P10408 | pIMBB7    | pET 16B             | (Sianidis et al, 2001)                                                                                                                                                                                                                                             |
| <i>prophoA</i> - His                                                          | P00634 | pIMBB882  | pET 22b             | (Gouridis et al, 2009)                                                                                                                                                                                                                                             |



|                                                     |        |           |               |                                                                                                                                                    |
|-----------------------------------------------------|--------|-----------|---------------|----------------------------------------------------------------------------------------------------------------------------------------------------|
| <i>escN</i>                                         | B7UMA6 | pIMBB1179 | pASK-IBA7plus | The <i>escN</i> gene was amplified from EPEC strain E2348/69 using primers X698 and X253, digested with NheI-BamHI and cloned in pASK-IBA7plus     |
| <i>escQ</i>                                         | B7UMA3 | pLMB0065  | pASK-IBA7plus | The <i>escQ</i> gene was amplified from EPEC strain E2348/69 using primers X1665 and X1444, digested with NheI-HindIII and cloned in pASK-IBA7plus |
| <i>escU</i>                                         | B7UMB8 | pLMB0064  | pASK-IBA7plus | The <i>escU</i> gene was amplified from EPEC strain E2348/69 using primers X1526 and X1527, digested with NheI-BamHI and cloned in pASK-IBA7plus   |
| <i>secB</i>                                         | P0AG86 | pIMBB490  | pET 16B       | The <i>secB</i> gene was amplified from <i>E. coli</i> DH5a strain using primers X264 and X265, digested with NdeI-BamHI and cloned in pET 16B     |
| <i>ompA</i>                                         | P0A910 | pIMBB454  | pET22B        | The <i>ompA</i> gene was amplified from <i>E. coli</i> DH5a strain using primers X191 and X193, digested with NdeI-EcoRI and cloned in pET 22B     |
| <i>zipA</i>                                         | P77173 | pIMBB1476 | pET22B        | The <i>zipA</i> gene was amplified from <i>E. coli</i> DH5a strain using primers X1408 and X1409, digested with NdeI-XhoI and cloned in pET 22B    |
| <b>Constructs used for <sup>35</sup>S-labelling</b> |        |           |               |                                                                                                                                                    |
| MM His- <i>cesAB</i>                                | B7UMC4 | pLMB0003  | pETDuet-1     | The <i>cesAB</i> gene was amplified from pIMBB585 using primers X1442 and X346, digested with NcoI-HindIII and cloned in pETDuet-1.                |
| MM His- <i>cesAB</i> ( $\Delta C$ )                 | B7UMC4 | pLMB0004  | pETDuet-1     | The <i>cesAB</i> (N1-86) gene was amplified from pIMBB585 using primers X1442 and X431, digested with NcoI-HindIII and cloned in pETDuet-1.        |
| MM His- <i>cesAB</i> (DRE)                          | B7UMC4 | pLMB0005  | pETDuet-1     | The gene was amplified from pIMBB1287 using primers X1442 and X346, digested with NcoI-HindIII and cloned in pETDuet-1.                            |

### Bacterial strains

To generate the deletion strains, the indicated gene was replaced by a gene encoding for the indicated antibiotic (Datsenko & Wanner, 2000)

| Bacterial strain <i>E. coli</i> | Description (gene deleted)                        | Reference/                |
|---------------------------------|---------------------------------------------------|---------------------------|
| DH5a                            |                                                   | Invitrogen                |
| BL21 (DE3)                      |                                                   | (Studier et al, 1990)     |
| BL21.19 (DE3)                   |                                                   | (Mitchell & Oliver, 1993) |
| BL31(DE3)                       |                                                   | (Chatzi et al, 2017)      |
| EPEC wt                         | <i>Escherichia coli</i> O127:H6 (strain E2348/69) | (Levine et al, 1978)      |

|                                                    |                                                              |                      |
|----------------------------------------------------|--------------------------------------------------------------|----------------------|
| EPEC $\Delta escN$                                 | $\Delta escN:: nptII(Kan^R)$                                 | (Iguchi et al, 2009) |
| EPEC $\Delta cesAB$                                | $\Delta cesAB:: nptII(Kan^R)$                                | (Iguchi et al, 2009) |
| EPEC $\Delta sepL$                                 | $\Delta sepL:: nptII(Kan^R)$                                 | (Munera et al, 2010) |
| EPEC $\Delta sepD$                                 | $\Delta sepD:: nptII(Kan^R)$                                 | (Iguchi et al, 2009) |
| EPEC $\Delta cesAB/\Delta espA$                    | $\Delta cesAB:: cat(Cam^R), \Delta espA:: nptII(Kan^R)$      | (Chen et al, 2011)   |
| EPEC $\Delta escQ$                                 | $\Delta escQ:: nptII(Kan^R)$                                 | This study           |
| EPEC $\Delta escV$                                 | $\Delta escV:: nptII(Kan^R)$                                 | This study           |
| EPEC<br><i>escU</i> $\Delta$ Cytoplasmic<br>domain | <i>escU</i> $\Delta$ 264-345:: <i>nptII(Kan<sup>R</sup>)</i> | This study           |
| EPEC <i>escV</i> $\Delta$ Cytoplasmic<br>domain    | <i>escV</i> $\Delta$ 334-675:: <i>nptII(Kan<sup>R</sup>)</i> | This study           |
| E2348/69 $\Delta cesL$                             | $\Delta cesL:: nptII(Kan^R)$                                 | This study           |
| EPEC $\Delta escV\Delta sepL$                      | $\Delta escV:: nptII(Kan^R), \Delta sepL:: cat(Cam^R)$       | This study           |
| EPEC $\Delta escV\Delta sepD$                      | $\Delta escV:: nptII(Kan^R), \Delta sepD:: cat(Cam^R)$       | This study           |

## List of primers

### Primers used for gene cloning and mutagenesis

| Primer Name | Forward/Reverse | Gene or/and Mutation Inserted        | Restriction Site | Sequence (5'-3') (Mutated codons are bold, restriction sites underlined) |
|-------------|-----------------|--------------------------------------|------------------|--------------------------------------------------------------------------|
| X191        | F               | <i>ompA</i>                          | NdeI             | GGAATTCATATGAAAAAGACAGCTATCGC                                            |
| X193        | R               | <i>ompA</i>                          | EcoRI            | CGGAATTCCTTAAGCCTGCGGCTGAGTTAC                                           |
| X239        | F               | <i>Mbp</i>                           | AseI             | CCGGATTAATATGAAAACCTGAAGAAGGTAAACTGG                                     |
| X240        | R               | <i>mbp</i> Inserts Tev cleavage site | NdeI             | CCCTTAAGCATATGGGCGCCCTGAAAATAAAGATTCTCAGTGGCTTCATCGACAGTCTGACG           |
| X253        | R               | <i>escN</i>                          | BamHI            | GCGGGATCCTCAGGCAACCACTTTGAATAGG                                          |
| X258        | F               | <i>espA</i>                          | NdeI             | GGGAATTCATATGGATACATCAACTACAGCA                                          |
| X259        | R               | <i>espA</i>                          | BamHI            | GCGGGATCCTTATTTACCAAGGGATATTCC                                           |
| X264        | F               | <i>secB</i>                          | NdeI             | GGGAATTCATATGTGAGAACAAAACAACACTGAAATG                                    |
| X265        | R               | <i>secB</i>                          | BamHI            | GCGGGATCCTTAGGCATCCTGATGTTCTTCAGTACC                                     |
| X345        | F               | <i>cesAB</i>                         | BamHI            | CGCGGATCCGATGAGTATTGTGAGCCAAACAAG                                        |
| X346        | R               | <i>cesAB</i>                         | HindIII          | CCCAAGCTTTCATACTATTTTTCTATTATTTCTATTCCG                                  |
| X375        | F               | <i>espA</i>                          | MfeI             | GGCCAATTGGGATACATCAACTACAGCATCAGTTG                                      |

|       |   |                                                 |         |                                                                |
|-------|---|-------------------------------------------------|---------|----------------------------------------------------------------|
| X376  | R | <i>espA</i>                                     | KpnI    | GGGGTACCTTATTTACCAAGGGATATTCTCG                                |
| X379  | F | <i>cesF</i>                                     | BamHI   | GCGGGATCCGAATGAACAATTTTGCAAAGATC                               |
| X380  | R | <i>cesF</i>                                     | SalI    | GGCGTTCGACTCAAAGTGAAAGTAGTTTTATTATTTT                          |
| X431  | R | <i>cesAB NI-86</i>                              | HindIII | CCCAAGCTTTCAACTCAGTGTCTCTATTAGTTTTTC                           |
| X453  | F | <i>cesAB</i>                                    | NheI    | GCGCCCTAGCTAGCATGAGTATTGTGAGCCAAACAAG                          |
| X698  | F | <i>escN</i>                                     | NheI    | GCGCCCTAGCTAGCATGATTTTCAGAGCATGATTCTG                          |
| X865  | F | <i>cesT</i>                                     | BamHI   | CGCGGATCCGATGTCATCAAGATCTGAACTT                                |
| X866  | R | <i>cesT</i>                                     | HindIII | CCCAAGCTTTTATCTTCCGGCGTAATAATG                                 |
| X867  | F | <i>Tir</i>                                      | MfeI    | GGCCAATTGGCCTATTGGTAACCTTGGT                                   |
| X868  | R | <i>Tir</i>                                      | KpnI    | GGGGGTACCTTAAACGAAACGTAAGTGGTCC                                |
| X897  | R | <i>Tir</i>                                      | HindIII | CCCAAGCTTTTAAACGAAACGTAAGTGGTCCCGG                             |
| X954  | F | <i>cesAB/D14L</i>                               |         | AAAGAACTATTACTGAAAAAAAAATAAGATCAGAAATTGAGGCG                   |
| X955  | R | <i>cesAB/D14L</i>                               |         | CGCCTCAATTTCTGATCTTATTTTTTTT <b>CAG</b> TAATAGTTCTTT           |
| X958  | F | <i>cesAB/D14L/R18D</i>                          |         | AAAGAACTATTACTGAAAAAAAAAT <b>GACT</b> CAGAAATTGAGGCG           |
| X959  | R | <i>cesAB/D14L/R18D</i>                          |         | CGCCTCAATTTCTG <b>AGTCT</b> ATTTTTTTTT <b>CAG</b> TAATAGTTCTTT |
| X978  | F | <i>sepD</i>                                     | NdeI    | GGGAATTCATATGAACAATAATAATGGCATAGCA                             |
| X979  | R | <i>sepD</i>                                     | XhoI    | GACCCGCTCGAGTTACACAATTCGTCTTATATC                              |
| X980  | F | <i>sepL</i>                                     | NdeI    | GGGAATTCATATGGCTAATGGTATTGAATTTAAT                             |
| X981  | R | <i>sepL</i>                                     | XhoI    | GACCCGCTCGAGTTACATAACATCCTCCTTATAATC                           |
| X1000 | F | <i>cesAB/E20L</i>                               |         | CTGAAAAAAAAACTGTCA <b>TTA</b> ATTGAGGCGATAAAAAAA               |
| X1001 | R | <i>cesAB/E20L</i>                               |         | TTTTTTTATCGCCTCAAT <b>TAAT</b> AGACAGTATTTTTTTT <b>CAG</b>     |
| X1018 | F | petDuet 1 RBS                                   | HindIII | CCCAAGCTTTTAAAGTATAAGAAGGAGATATACATATGGC                       |
| X1019 | R | <i>espA</i>                                     | HindIII | CCCAAGCTTTTATTTACCAAGGGATATTCCTGAAATAGT                        |
| X1221 | F | <i>cesAB/R89A/K91A</i>                          |         | GAGACACTGAGTCCAGC <b>AGCATCTGCA</b> AGCCAATCAACAATGAAT         |
| X1222 | R | <i>cesAB/R89A/K91A</i>                          |         | ATTCATTGTTGATTGGCT <b>TGCAGATGCT</b> GTCTGGACTCAGTGTCTC        |
| X1223 | F | <i>cesAB(R89A/K91A)/R99A/R101A</i>              |         | CAATCAACAATGAATCAAG <b>GCGAATGCA</b> AATAATAGAAAAATAGTA        |
| X1224 | R | <i>cesAB(R89A/K91A)/R99A/R101A</i>              |         | TACTATTTTTCTATTATTT <b>TGCATTGCT</b> TTGATTATTGTTGATTG         |
| X1225 | F | <i>cesAB(R89A/K91A)/R99A/R101A)/R104A/K105A</i> |         | CAAGCGAATGCAAATAAT <b>GACAGCA</b> ATAGTATGAAAGCTTGACCTG        |
| X1226 | R | <i>cesAB(R89A/K91A)/R99A/R101A)/R104A/K105A</i> |         | CAGGTCAAGCTTTTACTACTAT <b>TGCTGCA</b> ATTATTTGCATTGCTTGG       |
| X1265 | F | <i>Tir</i>                                      | BamHI   | CGCGGATCCGATGCCTATTGGTAACCTTGGTAATAATGTA                       |
| X1278 | F | <i>escV</i>                                     | BamHI   | CGCGGATCCGATGAATAAACTCTTAAATATATTTAAAAAAGCA                    |
| X1279 | R | <i>escV NI-20</i>                               | PstI    | AAAAGTGCAGAGCCAGAATAAGATCGTGATATGA                             |
| X1280 | F | <i>escV N510-675</i>                            | PstI    | AAAAGTGCAGCGCCAGCTTGGTTTTGAGCAA                                |
| X1281 | R | <i>escV N510-675</i>                            | HindIII | CCCAAGCTTTCATGCTCTGAAATCATTACCGT                               |

|              |   |                      |         |                                                     |
|--------------|---|----------------------|---------|-----------------------------------------------------|
| <b>X1408</b> | F | <i>zipA</i>          | NheI    | GGGAATTCCATATGATGCAGGATTTGCGTCTGATATTA              |
| <b>X1409</b> | R | <i>zipA</i>          | XhoI    | GACCCGCTCGAGGGCGTTGGCGTCTTTGACTTCGCG                |
| <b>X1442</b> | F | <i>cesAB</i>         | NcoI    | CATGCCATGGGCATGATGAGCAGCCATCACCATCATCAC             |
| <b>X1444</b> | R | <i>escQ</i>          | HindIII | CGCAAGCTTTTAATCACATACTACGCTAATAGT                   |
| <b>X1526</b> | F | <i>escU</i>          | NheI    | GCGCCCTAGCTAGC-GAAAAAACAGAAAAGCCCACAC               |
| <b>X1527</b> | R | <i>escU</i>          | BamHI   | CGCGGATCCTTAATAATCAAGGTCTATCGCAATAC                 |
| <b>X1665</b> | F | <i>escQ</i>          | NheI    | GCGCCCTAGCTAGC-ATGAAGCCATTGAGTTCACAAT               |
| <b>X1710</b> | R | <i>escV</i>          | XhoI    | GGCCTCGAGTCATGCTCTGAAATCATTTC                       |
| <b>X1730</b> | F | <i>cesL</i>          | BamHI   | CGCGGATCCGATGAATCTTTTAGTTAAAAGAAATG                 |
| <b>X1731</b> | R | <i>cesL</i>          | SalI    | ACGCGTCGACTTATGATGTCATCCTGCGAACG                    |
| <b>X1732</b> | F | <i>sepD</i>          | SalI    | ACGCGTCGACTTTAAGAAGGAGATATACCATGAACAATAATAATGGCATAG |
| <b>X1733</b> | R | <i>sepD</i>          | HindIII | CGCAAGCTTTTACACAATTCGTCCTATATCAG                    |
| <b>X1734</b> | F | <i>sepL N124-351</i> | NdeI    | GGGAATTCCATATGATGCCAAAGGGGGAAATTGTTG                |
| <b>X1735</b> | F | <i>sepL/R333D</i>    |         | ATTGATAACGAGCAG <b>GAC</b> AGTAATACATTATTA          |
| <b>X1736</b> | R | <i>sepL/R333D</i>    |         | TAATAATGTATTACT <b>GTC</b> CTGCTCGTTATCAAT          |
| <b>X1737</b> | R | <i>sepL N1-241</i>   | XhoI    | GACCCGCTCGAGTCATCATCTTACCTTGTCTTCAAAG               |
| <b>X1738</b> | R | <i>sepL N1-278</i>   | XhoI    | GACCCGCTCGAGTCATCATAAAATGACATCTTTATC                |
| <b>X1814</b> | F | <i>escV</i>          | NheI    | GCGCCCTAGCTAGCATGAATAAACTCTTAAATATATTTAAAAAAGCA     |
| <b>X1850</b> | F | <i>escV N334-675</i> | NdeI    | GGAATTCCATATGGATGCTATGGGAGCTGATTT                   |
| <b>X2068</b> | F | <i>cesL</i>          | NheI    | GCGCCCTAGCTAGCATGAATCTTTTAGTTAAAAGAAATG             |

**Primers used for gene replacement.**

Primers X1697, X1700, X1702 and X2067 were designed internally to the deleted gene to avoid polar effects due to the deletion of sequences in overlapping neighbor genes.

| Primer Name | Forward/Reverse | Gene or fragment deleted | Resistance introduced | Sequence (5'-3')                                                          |
|-------------|-----------------|--------------------------|-----------------------|---------------------------------------------------------------------------|
| X1494       | F               | <i>escV</i>              | Kan <sup>R</sup>      | ACTTTTCAACAGCATGTGCAGATTATTGAGCGCGTTTCGCAGGATGACATCTAGGCTGGAGCTGCTTC      |
| X1697       | F               | <i>escQ</i>              | Chlo <sup>R</sup>     | CGATTTTTATTTGCCGTTGTTGCCAGTTATCGGAACCGGTCGCCTCTATACATATGAATATCCTCCTTAG    |
| X1698       | R               | <i>escQ</i>              | Chlo <sup>R</sup>     | CCTGATAATGATGACGACATCATAACCTCCCTATATAACGCATTCCCTGATAGGCTGGAGCTGCTTC       |
| X1700       | R               | <i>escU</i>              | Kan <sup>R</sup>      | CAAGGTCTATCGCAATACGAATCAATTGTGCCACAGGTTCAAAAAAGTCTCATATGAATATCCTCCTTAG    |
| X1701       | F               | <i>escV</i>              | Kan <sup>R</sup>      | TCTTAAATATATTTAAAAAAGCAGAGTCATATCACGATCTTATTCTGGCTTAGGCTGGAGCTGCTTC       |
| X1702       | R               | <i>escV</i>              | Kan <sup>R</sup>      | GTTTCGATATTATTTCCCAACCTCCTGAAAAGAGAGCACGGGGACTGACGGGCATATGAATATCCTCCTTAG  |
| X1721       | F               | <i>escUA263-345</i>      | Kan <sup>R</sup>      | GAAGTTTGGCGAATAACATCAAAAAATCAACCGTTATTGTTAAAAACCCGTGATAATAGGCTGGAGCTGCTTC |
| X1722       | F               | <i>escVA333-675</i>      | Kan <sup>R</sup>      | TAGCCTGGAAATTACAGAAGAAAAGAACATTTGGAGCTGGCAATAATAAGTGATAATAGGCTGGAGCTGCTTC |
| X2066       | F               | <i>cesL</i>              | Kan <sup>R</sup>      | GCTTTTTCAAGCAATAATATTCACACGTATACTTACTTCAGAGCCTGCAGTAGGCTGGAGCTGCTTC       |
| X2067       | R               | <i>cesL</i>              | Kan <sup>R</sup>      | ACATCGATATTGGTTAACAACAACCTAAGCACAATTTATTATCGTAGACCATATGAATATCCTCCTTAG     |
| X2081       | F               | <i>sepL</i>              | Chlo <sup>R</sup>     | ACAGTACTATTTAATGGAATATTCATAATTAATGATTACGTGAGTTCCACATATGAATATCCTCCTTAG     |
| X2082       | R               | <i>sepL</i>              | Chlo <sup>R</sup>     | ACCTCTTCATAATCTTTCTTAGCATGACAAAAACTATAAAAAAACAATATAGGCTGGAGCTGCTTC        |

### Synthetic genes

To introduce the following multiple mutations (red in the sequence), the indicated *sepL* or *escV* DNA fragments were synthesized by GenScript®, delivered as pUC47 clones and subcloned in pASK IBA7plus vector (IBA life sciences).

| Gene/mutant    | Mutation introduced                         | Amino acid sequence                                                                                                                                                                                                                                                                                                                                                                                                                                                                                                                                                                         |
|----------------|---------------------------------------------|---------------------------------------------------------------------------------------------------------------------------------------------------------------------------------------------------------------------------------------------------------------------------------------------------------------------------------------------------------------------------------------------------------------------------------------------------------------------------------------------------------------------------------------------------------------------------------------------|
| <i>sepL</i>    |                                             |                                                                                                                                                                                                                                                                                                                                                                                                                                                                                                                                                                                             |
| Patch a        | E90S/ T93A/ K140A/ F141S/ K143A             | MANGIEFNQNPASVFNNSLDFFELESQQLTQKNSSNTSSPLINLQNELAMITSSSLSETIEGLSLGYRKGSARKEEEGTT<br>IEKLLNEMQ <b>SLLA</b> LTDSDKIKELSLKNSGLLEQHDPTLAMFGNMPKGEIVALISSLLQ <b>ASV</b> AIELKKKYAKLLLDLLGE<br>DDWELALLSWLGVGELN <b>Q</b> EGIQKIK                                                                                                                                                                                                                                                                                                                                                                 |
| Patch b        | K152S/ D156S/ E160A/ D161A/<br>D162S/ E164S | MANGIEFNQNPASVFNNSLDFFELESQQLTQKNSSNTSSPLINLQNELAMITSSSLSETIEGLSLGYRKGSARKEEEGTT<br>IEKLLNEMQ <b>ELL</b> TLTSDKIKELSLKNSGLLEQHDPTLAMFGNMPKGEIVALISSLLQ <b>SKFVK</b> IELKKKYA <b>SLLLSLLGA</b><br><b>ASWS</b> LALLSWLGVGELN <b>Q</b> EGIQKIK                                                                                                                                                                                                                                                                                                                                                 |
| Patch c        | D204A/ M207A/ E208S/ D211A                  | YEKAKDESDENGASLL <b>AWF</b> <b>ASIKAL</b> PEREKHLKVIIRALSFDLSYMSSFEDKVRTSSIIISDLCRIIIFLSLNNYTDIIAI<br>SIKKDKDVIILNEMLSIIIEHVWLTEDW <b>LES</b> SPSRVSI <b>VED</b> KHVYF <b>FHLL</b> KEFFASLPD <b>AC</b> FI <b>DNE</b> QRSNTLLMIGKVIDYK<br>EDVM*                                                                                                                                                                                                                                                                                                                                              |
| Patch d        | S257A/ N259A/ N260A T262S/<br>D263A         | YEKAKDESDENGASLLDWFMEIKDLPEREKHLKVIIRALSFDLSYMSSFEDKVRTSSIIISDLCRIIIFL <b>ALAA</b> YSAIIAI<br>SIKKDKDVIILNEMLSIIIEHVWLTEDW <b>LES</b> SPSRVSI <b>VED</b> KHVYF <b>FHLL</b> KEFFASLPD <b>AC</b> FI <b>DNE</b> QRSNTLLMIGKVIDYK<br>EDVM*                                                                                                                                                                                                                                                                                                                                                      |
| Patch e        | H313A/ K316V/ L338S                         | YEKAKDESDENGASLLDWFMEIKDLPEREKHLKVIIRALSFDLSYMSSFEDKVRTSSIIISDLCRIIIFLSLNNYTDIIAI<br>SIKKDKDVIILNEMLSIIIEHVWLTEDW <b>LES</b> SPSRVSI <b>VED</b> KHVYF <b>FALL</b> V <b>EFF</b> ASLPD <b>AC</b> FI <b>DNE</b> QRSNTL <b>SM</b> IGKVIDYK<br>EDVM*                                                                                                                                                                                                                                                                                                                                             |
| <i>escV</i>    |                                             |                                                                                                                                                                                                                                                                                                                                                                                                                                                                                                                                                                                             |
| Patch $\alpha$ | S359A/ N360S/ Y410A/ K411S/<br>D412S        | MNKLLNIFKKAESYHDLILALFFFMAVMMMIIPLPTVVVDIIIAINISTALLLLMLSIIYK <b>N</b> PLELTSFPTILLITTLMR<br>LSLSVSTTRLILLHHDAGDIIYSFGNFVGGNIVVGLVIFTIITIVQFMVITKGAERVAEVSARFSLDGMPGKQMSIDGD<br>MRAGVIDPLEAKVLR <b>SRVQ</b> KESQFYGSMDGAMK <b>FVK</b> GDAIAGIIIVLVNLFGGVLIGMWQFDMPFSEALS <b>SLF</b> SVLSVGDA<br>LVAQIPALIIISVTAGVVVTRVPGESEKEENLAGD <b>IVQ</b> QVSVNSRPF <b>LISA</b> ALMLVMAIIPGFPTLVFL <b>FLAV</b> CLLGI <b>AWK</b><br>LQKKRTFGAGNNKDAMGADLSNSQ <b>NI</b> SPGAEPLILNLS <b>AS</b> IYSSDITQQIEVMRW <b>NFF</b> EESGIPLPKIIVNPVKNND <b>SAI</b><br>EFLLYQES <b>IAS</b> STLIDDTVYFEAGHAEISFEFVQE |
| Patch $\beta$  | E401S/ L403A/ Q406A/ E407S/<br>S408A        | MNKLLNIFKKAESYHDLILALFFFMAVMMMIIPLPTVVVDIIIAINISTALLLLMLSIIYK <b>N</b> PLELTSFPTILLITTLMR<br>LSLSVSTTRLILLHHDAGDIIYSFGNFVGGNIVVGLVIFTIITIVQFMVITKGAERVAEVSARFSLDGMPGKQMSIDGD<br>MRAGVIDPLEAKVLR <b>SRVQ</b> KESQFYGSMDGAMK <b>FVK</b> GDAIAGIIIVLVNLFGGVLIGMWQFDMPFSEALS <b>SLF</b> SVLSVGDA<br>LVAQIPALIIISVTAGVVVTRVPGESEKEENLAGD <b>IVQ</b> QVSVNSRPF <b>LISA</b> ALMLVMAIIPGFPTLVFL <b>FLAV</b> CLLGI <b>AWK</b><br>LQKKRTFGAGNNKDAMGADLSNSQ <b>NI</b> SPGAEPLILNLS <b>SSNI</b> YSSDITQQIEVMRW <b>NFF</b> EESGIPLPKIIVNPVKNND <b>SAI</b><br><b>SFALYASA</b> IYKDTLIDDTVYFEAGHAEISFEFVQE |
| Patch $\gamma$ | K468S/ T470A/ F471V/ K474A/<br>K475S/ L478S | STNSIVYKTNKTNQQLAHLTGMDVYAT <b>TND</b> <b>SI</b> AVLL <b>AS</b> LV <b>SS</b> NAKEF <b>IGV</b> Q <b>ETRY</b> LMDIMERKYNELVKELQRQLGLSKI<br>VDILQRLVEENVSIRD <b>LRT</b> IFETLIFWSTKEKD <b>VV</b> ILCEYVRIALRRHILGRYSVSGTLLNVWLIGSDIENELRESIRQT<br>SSGSYLNISPERTEQ <b>II</b> IGFLKNIMNPTGNGVILTALDIRRVK <b>MM</b> IEGSFPSPV <b>LV</b> LSFQEVGNNIELKVLGT <b>VNDF</b> RA*                                                                                                                                                                                                                         |

**Immobilized peptide arrays**

The following 13 mer-, overlapping (by 10 residues) peptides were synthesized and immobilized on cellulose membranes by PepSpot Peptides, JPT Peptide Technologies, Germany.

| <b>SepL</b>    |                |     |                |     |               |     |                |     |                |     |                           |
|----------------|----------------|-----|----------------|-----|---------------|-----|----------------|-----|----------------|-----|---------------------------|
| No             | Sequence       | No  | Sequence       | No  | Sequence      | No  | Sequence       | No  | Sequence       | No  | Sequence                  |
| 1              | MANGIEFNQNPAS  | 20  | ETIEGLSLGYRKG  | 39  | DPTLAMFGNMPKG | 58  | GVGELNQEGIQKI  | 77  | DLSYMSSFEDKVR  | 96  | HVWLTEDWLLESP             |
| 2              | GIEFNQNPASVFN  | 21  | EGLSLGYRKG SAR | 40  | LAMFGNMPKGEIV | 59  | ELNQEGIQKIKKL  | 78  | YMSSFEDKVRTSS  | 97  | LTEDWLLES PSRV            |
| 3              | FNQNPASVFNSNS  | 22  | SLGYRKG SARKEE | 41  | FGNMPKGEIVALI | 60  | QEGIQKIKKLYEK  | 79  | SFEDKVRTSSIIS  | 98  | DWLLES PSRV SIV           |
| 4              | NPASVFNSNSLDF  | 23  | YRKG SARKEEEGT | 42  | MPKGEIVALISSL | 61  | IQKIKKLYEKAKD  | 80  | DKVRTSSIISDLC  | 99  | LES PSRV SIVEDK           |
| 5              | SVFNSNSLDFELE  | 24  | GSARKEEEGT TIE | 43  | GEIVALISSLLQS | 62  | IKKLYEKAKDEDS  | 81  | RTSSIISDLCRII  | 100 | PSRV SIVEDKHVY            |
| 6              | NSNSLDFELESQQ  | 25  | RKEEEGT TIEKLL | 44  | VALISSLLQSKFV | 63  | LYEKAKDEDS ENG | 82  | SIISDLCRIIIFL  | 101 | VSIVEDK H V Y F H         |
| 7              | SLDFELESQQLTQ  | 26  | EEGT TIEKLLNEM | 45  | ISSLLQSKFVKIE | 64  | KAKDEDS ENGASL | 83  | SDLCRIIIFLSLN  | 102 | VEDKH V Y F H L L K       |
| 8              | FELESQQLTQKNS  | 27  | T TIEKLLNEMQEL | 46  | LLQSKFVKIELKK | 65  | DEDS ENGASLLDW | 84  | CRIIIFLSLN NYT | 103 | KH V Y F H L L K E F F    |
| 9              | ESQQLTQKNSSNT  | 28  | EKLLNEMQELLTL  | 47  | SKFVKIELKKKYA | 66  | SENGASLLDWFME  | 85  | IIFLSLN NYTDII | 104 | Y F H L L K E F F A S L   |
| 10             | QLTQKNSSNTSSP  | 29  | LNEMQELLTLTDS  | 48  | VKIELKKKYAKLL | 67  | GASLLDWFMEIKD  | 86  | LSLN NYTDIIAIS | 105 | H L L K E F F A S L P D A |
| 11             | QKNSSNTSSPLIN  | 30  | MQELLTLTDSDKI  | 49  | ELKKKYAKLLLDL | 68  | LLDWFMEIKDLPE  | 87  | NNYTDIIAISIKK  | 106 | K E F F A S L P D A C F I |
| 12             | SSNTSSPLINLQN  | 31  | LLTLTDSDKIKEL  | 50  | KKYAKLLLDLLGE | 69  | WFMEIKDLPEREK  | 88  | TDIIAISIKKDKD  | 107 | F A S L P D A C F I D N E |
| 13             | TSSPLINLQNELA  | 32  | LTDSDKIKELSLK  | 51  | AKLLLDLLGEDDW | 70  | EIKDLPEREKHLK  | 89  | IAISIKKDKDVIL  | 108 | L P D A C F I D N E Q R S |
| 14             | PLINLQNELAMIT  | 33  | SDKIKELSLKNSG  | 52  | LLDLLGEDDWELA | 71  | DLPEREKHLKVII  | 90  | SIKKDKDVILNEM  | 109 | A C F I D N E Q R S N T L |
| 15             | NLQNELAMITSSS  | 34  | IKELSLKNSGLE   | 53  | LLGEDDWELALLS | 72  | EREKHLKVIIIRAL | 91  | KDKDVILNEMLSI  | 110 | I D N E Q R S N T L L M I |
| 16             | NELAMITSSSLSE  | 35  | LSLKNSGLEQHD   | 54  | EDDWELALLSWLG | 73  | KHLKVIIIRALSFD | 92  | DVILNEMLSIIEH  | 111 | E Q R S N T L L M I G K V |
| 17             | AMITSSSLSETIE  | 36  | KNSGLEQHDPTL   | 55  | WELALLSWLGVGE | 74  | KVIRALSFDLSY   | 93  | LNEMLSIIEHVWL  | 112 | S N T L L M I G K V I D Y |
| 18             | TSSSLSETIEGLS  | 37  | GLLEQHDPTLAMF  | 56  | ALLSWLGVGELNQ | 75  | IRALSFDLSYMSS  | 94  | MLSIIIEHVWLTED | 113 | L L M I G K V I D Y K E D |
| 19             | SLSETIEGLSLGY  | 38  | EQHDPTLAMFGNM  | 57  | SWLGVGELNQEGI | 76  | LSFDLSYMSSFED  | 95  | IIIEHVWLTEDWLL | 114 | M I G K V I D Y K E D V M |
| <b>EscV CD</b> |                |     |                |     |               |     |                |     |                |     |                           |
| No.            | Sequence       | No. | Sequence       | No. | Sequence      | No. | Sequence       | No. | Sequence       | No. | Sequence                  |
| 1              | DAMGADLSNSQNI  | 20  | NPVKNNDSAIEFL  | 39  | KTNQQLAHLTGMD | 58  | VKELQRQLGLSKI  | 77  | LRRHILGRYSVSG  | 96  | NIMNPTGNGVILT             |
| 2              | GADLSNSQNI SPG | 21  | KNNDSAIEFLLYQ  | 40  | QQLAHLTGMDVYA | 59  | LQRQLGLSKIVDI  | 78  | HILGRYSVSGTLL  | 97  | NPTGNGVILTALD             |
| 3              | LSNSQNI SPGAEP | 22  | DSAIEFLLYQESI  | 41  | AHLTGMDVYATTN | 60  | QLGLSKIVDILQR  | 79  | GRYSVSGTLLNVW  | 98  | GNGVILTALDIRR             |

|    |                |    |                |    |                |    |                |    |                 |     |               |
|----|----------------|----|----------------|----|----------------|----|----------------|----|-----------------|-----|---------------|
| 4  | SQNISPGAEP LIL | 23 | IEFLLYQESIYKD  | 42 | TGMDVYATTNDKI  | 61 | LSKIVDILQRLVE  | 80 | SVSGTLLNVWLVIG  | 99  | VILTALDIRRYVK |
| 5  | ISPGAEP LILNLS | 24 | LLYQESIYKDTLI  | 43 | DVYATTNDKITFL  | 62 | IVDILQRLVEENV  | 81 | GTLNVLWLVIGSDI  | 100 | TALDIRRYVKKMI |
| 6  | GAEPLILNLSSNI  | 25 | QESIYKDTLIDDT  | 44 | ATTNDKITFLLKK  | 63 | ILQRLVEENV SIR | 82 | LVWLVIGSDIENE   | 101 | DIRRYVKKMIEGS |
| 7  | PLILNLSSNIYSS  | 26 | IYKDTLIDDTVYF  | 45 | NDKITFLLKLV L  | 64 | RLVEENV SIRDLR | 83 | WLVIGSDIENELRE  | 102 | RYVKKMIEGSFPS |
| 8  | LNLSSNIYSSDIT  | 27 | DTLIDDTVYFEAG  | 46 | ITFLLKLVLSNA   | 65 | EENV SIRDLRTIF | 84 | GSDIENELRESIR   | 103 | KKMIEGSFPSVPV |
| 9  | SSNIYSSDITQQI  | 28 | IDDTVYFEAGHAE  | 47 | LLKLVLSNAKEF   | 66 | VSIRDLRTIFETL  | 85 | IENELRESIRQTS   | 104 | IEGSFPSVPLSF  |
| 10 | IYSSDITQQIEVM  | 29 | TVYFEAGHAEISF  | 48 | KLVL SNAKEFIGV | 67 | RDLRTIFETLIFW  | 86 | ELRESIRQTSSGS   | 105 | SFPSVPLSFQEV  |
| 11 | SDITQQIEVMRWN  | 30 | FEAGHAEISFEFV  | 49 | LSNAKEFIGVQET  | 68 | RTIFETLIFWSTK  | 87 | ESIRQTSSGSYLN   | 106 | SVPVLSFQEVGNN |
| 12 | TQQIEVMRWNFFE  | 31 | GHA EISFEFVQEK | 50 | AKEFIGVQETRYL  | 69 | FETLIFWSTKEKD  | 88 | RQTSSGSYLNISP   | 107 | VLSFQEVGNNIEL |
| 13 | IEVMRWNFFEESG  | 32 | EISFEFVQEK LST | 51 | FIGVQETRYLMDI  | 70 | LIFWSTKEKDVVI  | 89 | SSGSYLNISP PERT | 108 | FQEVGNNIELKVL |
| 14 | MRWNFFEESGIPL  | 33 | FEFVQEK LSTNSI | 52 | VQETRYLMDIMER  | 71 | WSTKEKDVVILCE  | 90 | SYLNISP ERTEQI  | 109 | VGNNIELKVLGTV |
| 15 | NFFEESGIPLPKI  | 34 | VQEK LSTNSIVYK | 53 | TRYLMDIMERKYN  | 72 | KEKDVVILCEYVR  | 91 | NISP ERTEQIIGF  | 110 | NIELKVLGTVNDF |
| 16 | EESGIPLPKIIVN  | 35 | KLSTNSIVYKTNK  | 54 | LMDIMERKYNELV  | 73 | DVVILCEYVRIAL  | 92 | PERTEQIIGFLKN   | 111 | ELKVLGTVNDFRA |
| 17 | GIPLPKIIVNPVK  | 36 | TNSIVYKTNKTNQ  | 55 | IMERKYNELVKEL  | 74 | ILCEYVRIALRRH  | 93 | TEQIIGFLKNIMN   |     |               |
| 18 | LPKIIVNPVKNNND | 37 | IVYKTNKTNQQLA  | 56 | RKYNELVKELQRQ  | 75 | EYVRIALRRHILG  | 94 | IIGFLKNIMNPTG   |     |               |
| 19 | IIVNPVKNNDSAI  | 38 | KTNKTNQQLAHLT  | 57 | NELVKELQRQLGL  | 76 | RIALRRHILGRYS  | 95 | FLKNIMNPTGNGV   |     |               |



### Preparation of Inverted inner membrane vesicles (IMVs)

EPEC cells, grown overnight (200 mL LB; 37 °C) were used to inoculate 15 L LB (37 °C; 5 h). Cells were harvested (5,000 x g; 20 min; 4 °C; Avanti J-26S XPI, Beckman; JLA 8.1000 rotor), resuspended in Buffer F and lysed using a French press (8,000 psi; 5-6 times). Unbroken cells were removed (3,000 x g; 10 min; Sigma 3-16KL; rotor 11180) before the supernatant was ultra-centrifuged (100,000 x g; 90 min; 4 °C; fixed angle 45Ti rotor; Optima XPN-80, Beckman). The membrane pellet was Dounce-homogenized in Buffer F, loaded (2.5 mL) on top of a 5-step sucrose gradient (1.9; 1.7; 1.5; 1.3; 1.1 M sucrose in 50 mM Tris pH: 8.0; 6 mL / layer) and centrifuged (100,000 x g; 16 h; 4 °C; swinging bucket SW32 Ti rotor, Optima XPN-80, Beckman) (equilibrium centrifugation). Inverted Inner Membrane Vesicles (IMVs) were collected from gradient fractions 2-3, resuspended in Buffer F and re-centrifuged (100,000 x g; 90 min; 4 °C; fixed angle 45Ti rotor; Optima XPN-80, Beckman). The membrane pellet was homogenized in 6 M Urea-Buffer C (35 min; ice), loaded on top of an equal volume of 0.2 M Sucrose-Buffer C and centrifuged (100,000 x g; 90 min; 4 °C; swinging bucket SW32 Ti rotor, Optima XPN-80, Beckman). Finally, IMVs were collected (Chang et al, 1978; Cunningham et al, 1989; Lill et al, 1989; Lill et al, 1990; Rhoads et al, 1984), homogenized in Buffer C, passed through an Avestin LiposoFast-Basic system (100 nm pore size filter; 15-21 times) and stored in aliquots at -80 °C.

### *In vitro* protein labeling with [<sup>35</sup>S]-methionine

For protein labeling *in vitro* we used the Easy Tag™ L- [<sup>35</sup>S]-methionine (1 mCi, Perkin Elmer) and the TNT® Quick coupled Transcription/Translation systems (Promega), according to the manufacturer's instructions and as described (Gouridis et al, 2010; Gouridis et al, 2013). At the end of the labeling process, a buffer exchange step was included, using hand-made columns (1 ml syringes; G-50 resin; equilibrated with Buffer A). Proteins were aliquoted and stored in Buffer B (maximum 3-5 days; -20 °C).

### Affinity measurements/ Determination of equilibrium dissociation constants ( $K_{ds}$ )

Proteins, stored in Buffer B, were serially diluted in Buffer C (20 concentration points well distributed within the 0.01-5 μM range were used) and added to reactions (final volume 20 μl in Buffer C) containing IMVs (20 μg total membrane protein/reaction), as described (Gouridis et al, 2009; Gouridis et al, 2010; Gouridis et al, 2013). The [<sup>35</sup>S]-labelled protein, diluted (4 times), was added to all the reactions, as a tracer (1 μl / reaction). Samples were incubated (20 min; ice), overlaid on an equal volume of BSA/sucrose cushion (0.2 M Sucrose; 1 mg/ml BSA in Buffer C) and centrifuged (300,000 x g; 20 min; 4 °C; rotor TL-100; Optima Max-XP, Beckman-Coulter). The pellet (containing IMVs and IMVs-bound proteins) was resuspended in 300 μl buffer C by using a waterbath sonicator and then proteins were immobilized on a nitrocellulose membrane using a vacuum manifold (Bio-Dot apparatus; Bio-Rad). Binding of [<sup>35</sup>S]-labelled proteins on IMVs was visualized by using a high resolution phosphor storage screen (GE Healthcare) on a Typhoon FLA 9500 system (GE Healthcare). For signal - quantification we used the Image Quant software (GE Healthcare). Data were analyzed by non-linear regression fit for one binding site, using Prism 5 (GraphPad). For the determination of one  $K_d$ , 9-14 repetitions were performed, each repeat using 20-25 concentration points.

### CesAB/EspA *in vivo* and *in vitro* cross-linking

Purified His CesAB/EspA (50 μM; Buffer D) was incubated with succinimidyl 4,4'-azipentanoate (SDA-NHS-Diazerine; 240 μM; 2 h; dark; 4 °C) and quenched (10 mM Tris/HCl pH: 8; 30 min; ice). The labeled complex was diluted (to 10 μM in Buffer C), mixed with either His-CesL/SepD/SepL complex (10 μM in Buffer C) or IMVs (100 μg total membrane protein),

incubated (100  $\mu$ l reactions; 5 min; 4 °C) and UV irradiated (10 cm dist. from UV source; BLX-365 UV; Vilber Lourmat; 15min; 4 °C). IMV-containing samples were ultra-centrifuged (250,000 x g; 15 min; 4 °C) and resuspended in 100  $\mu$ l Buffer C. Cross-linked polypeptides were analyzed on 12% SDS-PAGE, electrotransferred and immunostained. The synthesis of SDA-NHS-Diazerine will be detailed elsewhere.

### **IMVs immunostaining coupled with electron microscopy**

IMVs (10  $\mu$ g total membrane protein / 50  $\mu$ l; Buffer C) were sonicated (3 x 15 sec; bath sonicator; 4 °C), applied (5  $\mu$ l) on a glow-discharged 400 mesh carbon and formvar coated copper grids (TedPella; Redding CA, USA). After 5min (RT), grids were washed (1 x PBS) incubated with  $\alpha$ -EscVC-domain antibodies (1:500; 1 h; RT) and then with 2<sup>nd</sup><sup>ary</sup>  $\alpha$ -rabbit coupled to 5 nm GOLD particles (1:500; 1 h; RT). Grids were further incubated with 1% Uranyl Acetate in Milli Q water (1 min; RT), blotted, dried and observed (JEM1400; 80 kV; JEOL USA, Inc; equipped with Olympus SIS 11Mpxl; VIB/KUL imaging facility).

### **Hydrogen-deuterium exchange (HDX) mass spectrometry (MS)**

Local HDX-MS was performed as described (Tsirigotaki et al, 2017) with slight modifications. Proteins (Buffer B) were dialyzed (16 h; Buffer E; 4 °C) and concentrated (144  $\mu$ M). 1  $\mu$ l of protein sample was diluted with 49  $\mu$ l deuterated buffer E [lyophilized; freshly dissolved in D<sub>2</sub>O (99.9% atom D, Euriso-top); pD 6.6] on ice, resulting in 98% v/v D content. pD refers to the corrected value for the isotope effect. At 10 sec, the exchange reaction was quenched by acidification (pD 2.5) and freezing in liquid nitrogen. The quenching solution contained urea (2 M), formic acid (Ultra-pure, Merck) and protease XIII (1.3 mg/ml) from *Aspergillus saitoi* (Sigma). In-solution digestion was allowed (2 min; ice) prior to freezing. 48 pmol CesAB from the quenched reaction (0.96  $\mu$ M) were injected into a nanoACQUITY UPLC/ HDX (Waters) coupled with a Synapt G2 (Waters) mass spectrometer. Data acquisition was performed using the MassLynX interface (version 4.1 SCN870, Waters) and data analysis using the ProteinLynX Global Server (PLGS v3.01, Waters) and DynamX software (v3.0, Waters).

### **Surface proteolysis of IMVs**

IMVs (10  $\mu$ g total membrane protein) were resuspended [50 mM Ammonium Bicarbonate Solution (ABS)] using 3 x 15sec pulses in a bath sonicator. For the reduction and alkylation of cysteines, samples were first incubated with 1 mM Tris (2-carboxyethyl) phosphine hydrochloride (TCEP) (30 min; 22 °C) and then with 10 mM Iodoacetamide (IAA) (30 min; 22 °C; dark). Protein samples were incubated with Trypsin (0.1  $\mu$ g; Trypsin Gold, Promega; 15 h; 37 °C; shaking) acidified (Trifluoroacetic acid; TFA; pH <2), lyophilized (Speedvac; Savant) and desalted using custom made C18 column-tips (Rappsilber et al, 2007; Tsolis & Economou, 2017a).

### **LC-MS/MS analysis**

Lyophilized samples were dissolved in aqueous solution [0.1% v/v formic acid (FA); 5% v/v Acetonitrile (ACN)] prior to their analysis on a nano-Reverse Phase LC coupled to a Q Exactive™ Hybrid Quadrupole Orbitrap mass spectrometer, through a nano-electrospray ion source (Thermo Scientific). Peptides were first separated using a Dionex UltiMate 3000 UHPLC system on an EasySpray C18 column (Thermo Scientific; OD 360  $\mu$ m; ID 50  $\mu$ m; 15 cm length; C18; 2  $\mu$ m) at of 300 nLmin<sup>-1</sup>. The LC mobile phase consisted of two buffer solutions; Buffer 1 (0.1% v/v FA) and Buffer 2 (0.08% v/v FA; 80% v/v ACN). A 60 min multistep Buffer 1:Buffer 2 gradient was used, as follows (% are shown in parentheses below): 0–3 min (96:4); 3–15 min (90:10); 15–35 min (65:35); 35–40 min (35:65); 40–41 min (5:95);

41-50 min (5:95); 50-51 min (95:5); 51-60 min (95:5). The separated peptides were analyzed in the Orbitrap QE operated in positive ion mode (nanospray 1.5 kV; source temperature 250 °C). The instrument was operated in data-dependent acquisition mode: survey MS scan resolution 70,000; full width half maximum (FWHM) for the mass range of  $m/z$  400-1600 for precursor ions; MS/MS scans of the top 10 most intense peaks with +2, +3 and +4 charged ions above a threshold ion count of 16,000 at 35,000 resolution. MS/MS was performed using: normalized collision energy (NCE; 25%); isolation window 3.0  $m/z$ ; apex trigger 5-15 sec; dynamic exclusion 10 sec. Data were acquired with Xcalibur 2.2 software (Thermo Scientific).

### MS data analysis

Raw MS files were analyzed by MaxQuant v1.5.3.30 (Cox & Mann, 2008). MS/MS spectra were searched by the Andromeda search engine against the Uniprot EPEC E2348/69 sequence (taxon id: 574521; 4,595 proteins; February 2016) and common contaminants as described (Cox et al, 2011), using a peptide and protein false discovery identification rate (FDR) of 1%. Confidence of T3SS protein identification was derived from the maximum peptide identification score and minimum posterior error probability (PEP) of the Andromeda search engine output (identification confidence: “High” = Score > 75 and PEP < 0.0001; “Medium” = Score > 40 and PEP < 0.01). Protease specificity was set to trypsin, allowing for a maximum of two missed cleavages. Dynamic (methionine oxidation and N-terminal acetylation) and fixed (S-Carbamidomethylation of cysteinyl residues) modifications were selected. Precursor and MS/MS mass tolerance was set to 10 ppm for the parent ion mass and 20 ppm for the fragment ion mass. Peptide features were aligned between different runs by matching the retention time and feature masses (“match between runs” feature; match time window 0.7 min; mass alignment window 10 min). Peptide intensities across the MS runs were normalized based on the abundance of membrane proteins. EPEC non-T3S inner membrane proteins were selected based on the degree of homology with the *E. coli* K12 proteins (STEPdb; (Orfanoudaki & Economou, 2014)). One run of the dataset was selected as reference; a normalization factor was calculated by subtracting the mean of log peptide intensities of each MS-run from the reference one (Callister et al, 2006). Log-peptide intensities for all the identified peptides in the dataset were corrected based on the calculated normalization factors. For comparison of the protein abundance across the runs we used the sum of normalized peptide intensities. To identify proteins with differential abundance between EPEC IMVs and Urea treated IMVs we used a combination of two-side t-test and fold difference of mean abundance. Sum of peptide intensities (TIC: total ion current) were log<sub>2</sub> transformed and tested for significance using a two-side t-test, without assumption of equal variance. Missing values were omitted. Calculated p-values were adjusted for multiple hypothesis testing error using the “Benjamini-Hochberg” (Benjamini & Hochberg, 1995) method, as previously described (Tsolis et al, 2016; Tsolis & Economou, 2017b). Proteins identified in at least three repeats in each group were compared. Fold difference was calculated by dividing the mean raw TIC from untreated IMVs over the urea treated ones. Proteins identified in at least three repeats in each of the comparing groups were considered significant if the adjusted p-value was < 0.05 and the fold difference was > 2x (or log<sub>2</sub> fold difference > 1). EscF, Ler and EscN that were identified in 5 repeats of untreated IMVs and in 2 or less of urea-treated ones were considered significant in the untreated condition, assuming they were no longer detected, due to low abundance. The mass spectrometry proteomics data have been deposited to the ProteomeXchange Consortium via the PRIDE (Vizcaino et al, 2016) partner repository with the dataset identifier PXD007087.

### Western Blot analysis

Protein samples were analyzed in SDS-PAGE gels and transferred onto nitrocellulose membrane (PROTRAN) using Semi-Dry Transfer protocol (30min; RT; 20V; 300mA)

following manufacturer's instruction (BIORAD). Images were acquired using Las 4000 (GE Healthcare) and Image Quant Las<sup>TM</sup> 4000, version 1.2 software. For image acquisition the manufacturer's setting were used (Resolution/ Sensitivity: standard mode; Exposure time 10-16 min; Image dimensions 210 x 140 mm; Image resolution 176 dpi)

### **Analysis of protein structures**

Protein structures were downloaded from the Protein Data Bank (<http://www.rcsb.org/>; PDB codes are indicated) and visualized using Swiss PDB viewer and The PyMOL Molecular Graphics System (Version 0.99, Schrödinger, LLC). FASTA protein sequences were downloaded from Uniprot (<http://www.uniprot.org/>; STEPdb; (Orfanoudaki & Economou, 2014). SepL and EscV CD sequence alignment and conservation was performed using the "ConSurf Database software" ([http://bental.tau.ac.il/new\\_ConSurfDB/](http://bental.tau.ac.il/new_ConSurfDB/)). The EscV CD model was made using SWISS-MODEL SERVER (<http://swissmodel.expasy.org>) and Shigella *flexneri* MxiA (4A5P) based on their homology. Disorder prediction was performed on the IUPred web server (<http://iupred.enzim.hu/>; (Dosztanyi et al, 2005).

## References

- Benjamini Y, Hochberg Y (1995) Controlling the False Discovery Rate: A Practical and Powerful Approach to Multiple Testing. *Journal of the Royal Statistical Society Series B (Methodological)* **57**: 289-300
- Botteaux A, Sory MP, Biskri L, Parsot C, Allaoui A (2009) MxiC is secreted by and controls the substrate specificity of the Shigella flexneri type III secretion apparatus. *Molecular microbiology* **71**: 449-460
- Burkinshaw BJ, Souza SA, Strynadka NC (2015) Structural analysis of SepL, an enteropathogenic Escherichia coli type III secretion-system gatekeeper protein. *Acta crystallographica Section F, Structural biology communications* **71**: 1300-1308
- Callister SJ, Barry RC, Adkins JN, Johnson ET, Qian WJ, Webb-Robertson BJ, Smith RD, Lipton MS (2006) Normalization approaches for removing systematic biases associated with mass spectrometry and label-free proteomics. *Journal of proteome research* **5**: 277-286
- Chang CN, Blobel G, Model P (1978) Detection of prokaryotic signal peptidase in an Escherichia coli membrane fraction: endoproteolytic cleavage of nascent fl pre-coat protein. *Proceedings of the National Academy of Sciences of the United States of America* **75**: 361-365
- Chatzi KE, Sardis MF, Tsirigotaki A, Koukaki M, Sostaric N, Konijnenberg A, Sobott F, Kalodimos CG, Karamanou S, Economou A (2017) Preprotein mature domains contain translocase targeting signals that are essential for secretion. *The Journal of cell biology* **216**: 1357-1369
- Chen L, Balabanidou V, Remeta DP, Minetti CA, Portaliou AG, Economou A, Kalodimos CG (2011) Structural instability tuning as a regulatory mechanism in protein-protein interactions. *Molecular cell* **44**: 734-744
- Cox J, Mann M (2008) MaxQuant enables high peptide identification rates, individualized p.p.b.-range mass accuracies and proteome-wide protein quantification. *Nature biotechnology* **26**: 1367-1372
- Cox J, Neuhauser N, Michalski A, Scheltema RA, Olsen JV, Mann M (2011) Andromeda: a peptide search engine integrated into the MaxQuant environment. *Journal of proteome research* **10**: 1794-1805
- Creasey EA, Friedberg D, Shaw RK, Umanski T, Knutton S, Rosenshine I, Frankel G (2003) CesAB is an enteropathogenic Escherichia coli chaperone for the type-III translocator proteins EspA and EspB. *Microbiology* **149**: 3639-3647
- Cunningham K, Lill R, Crooke E, Rice M, Moore K, Wickner W, Oliver D (1989) SecA protein, a peripheral protein of the Escherichia coli plasma membrane, is essential for the functional binding and translocation of proOmpA. *The EMBO journal* **8**: 955-959
- Datsenko KA, Wanner BL (2000) One-step inactivation of chromosomal genes in Escherichia coli K-12 using PCR products. *Proc Natl Acad Sci U S A* **97**: 6640-6645

Dosztanyi Z, Csizmok V, Tompa P, Simon I (2005) IUPred: web server for the prediction of intrinsically unstructured regions of proteins based on estimated energy content. *Bioinformatics* **21**: 3433-3434

Gouridis G, Karamanou S, Gelis I, Kalodimos CG, Economou A (2009) Signal peptides are allosteric activators of the protein translocase. *Nature* **462**: 363-367

Gouridis G, Karamanou S, Koukaki M, Economou A (2010) In vitro assays to analyze translocation of the model secretory preprotein alkaline phosphatase. *Methods in molecular biology* **619**: 157-172

Gouridis G, Karamanou S, Sardis MF, Scharer MA, Capitani G, Economou A (2013) Quaternary dynamics of the SecA motor drive translocase catalysis. *Molecular cell* **52**: 655-666

Guzman LM, Belin D, Carson MJ, Beckwith J (1995) Tight regulation, modulation, and high-level expression by vectors containing the arabinose PBAD promoter. *J Bacteriol* **177**: 4121-4130

Iguchi A, Thomson NR, Ogura Y, Saunders D, Ooka T, Henderson IR, Harris D, Asadulghani M, Kurokawa K, Dean P, Kenny B, Quail MA, Thurston S, Dougan G, Hayashi T, Parkhill J, Frankel G (2009) Complete genome sequence and comparative genome analysis of enteropathogenic *Escherichia coli* O127:H6 strain E2348/69. *J Bacteriol* **191**: 347-354

Karamanou S, Bariami V, Papanikou E, Kalodimos CG, Economou A (2008) Assembly of the translocase motor onto the preprotein-conducting channel. *Molecular microbiology* **70**: 311-322

Levine MM, Bergquist EJ, Nalin DR, Waterman DH, Hornick RB, Young CR, Sotman S (1978) *Escherichia coli* strains that cause diarrhoea but do not produce heat-labile or heat-stable enterotoxins and are non-invasive. *Lancet* **1**: 1119-1122

Lill R, Cunningham K, Brundage LA, Ito K, Oliver D, Wickner W (1989) SecA protein hydrolyzes ATP and is an essential component of the protein translocation ATPase of *Escherichia coli*. *The EMBO journal* **8**: 961-966

Lill R, Dowhan W, Wickner W (1990) The ATPase activity of SecA is regulated by acidic phospholipids, SecY, and the leader and mature domains of precursor proteins. *Cell* **60**: 271-280

Mitchell C, Oliver D (1993) Two distinct ATP-binding domains are needed to promote protein export by *Escherichia coli* SecA ATPase. *Mol Microbiol* **10**: 483-497

Munera D, Crepin VF, Marches O, Frankel G (2010) N-terminal type III secretion signal of enteropathogenic *Escherichia coli* translocator proteins. *Journal of bacteriology* **192**: 3534-3539

Orfanoudaki G, Economou A (2014) Proteome-wide subcellular topologies of *E. coli* polypeptides database (STEPdb). *Molecular & cellular proteomics : MCP* **13**: 3674-3687

- Rappsilber J, Mann M, Ishihama Y (2007) Protocol for micro-purification, enrichment, pre-fractionation and storage of peptides for proteomics using StageTips. *Nat Protoc* **2**: 1896-1906
- Rhoads DB, Tai PC, Davis BD (1984) Energy-requiring translocation of the OmpA protein and alkaline phosphatase of *Escherichia coli* into inner membrane vesicles. *Journal of bacteriology* **159**: 63-70
- Schneider CA, Rasband WS, Eliceiri KW (2012) NIH Image to ImageJ: 25 years of image analysis. *Nature methods* **9**: 671-675
- Sianidis G, Karamanou S, Vrontou E, Boulias K, Repanas K, Kyrpides N, Politou AS, Economou A (2001) Cross-talk between catalytic and regulatory elements in a DEAD motor domain is essential for SecA function. *The EMBO journal* **20**: 961-970
- Studier FW, Rosenberg AH, Dunn JJ, Dubendorff JW (1990) Use of T7 RNA polymerase to direct expression of cloned genes. *Methods in enzymology* **185**: 60-89
- Tsirigotaki A, Papanastasiou M, Trelle MB, Jørgensen TJD, Economou A (2017) Chapter Four - Analysis of Translocation-Competent Secretory Proteins by HDX-MS. In *Methods in Enzymology*, Arun KS (ed), Vol. Volume 586, pp 57-83. Academic Press
- Tsolis KC, Bagli E, Kanaki K, Zografou S, Carpentier S, Bei ES, Christoforidis S, Zervakis M, Murphy C, Fotsis T, Economou A (2016) Proteome Changes during Transition from Human Embryonic to Vascular Progenitor Cells. *Journal of proteome research* **15**: 1995-2007
- Tsolis KC, Economou A (2017a) Chapter Two - Quantitative Proteomics of the *E. coli* Membranome. In *Methods in Enzymology*, Arun KS (ed), Vol. Volume 586, pp 15-36. Academic Press
- Tsolis KC, Economou A (2017b) Quantitative Proteomics of the *E. coli* Membranome. *Methods Enzymol* **586**: 15-36
- Vizcaino JA, Csordas A, del-Toro N, Dianes JA, Griss J, Lavidas I, Mayer G, Perez-Riverol Y, Reisinger F, Ternent T, Xu QW, Wang R, Hermjakob H (2016) 2016 update of the PRIDE database and its related tools. *Nucleic acids research* **44**: D447-456
- Younis R, Bingle LE, Rollauer S, Munera D, Busby SJ, Johnson S, Deane JE, Lea SM, Frankel G, Pallen MJ (2010) SepL resembles an aberrant effector in binding to a class 1 type III secretion chaperone and carrying an N-terminal secretion signal. *Journal of bacteriology* **192**: 6093-6098
