# Supplementary material
Source: PubMed Central journal article supplement (PMC5709732)

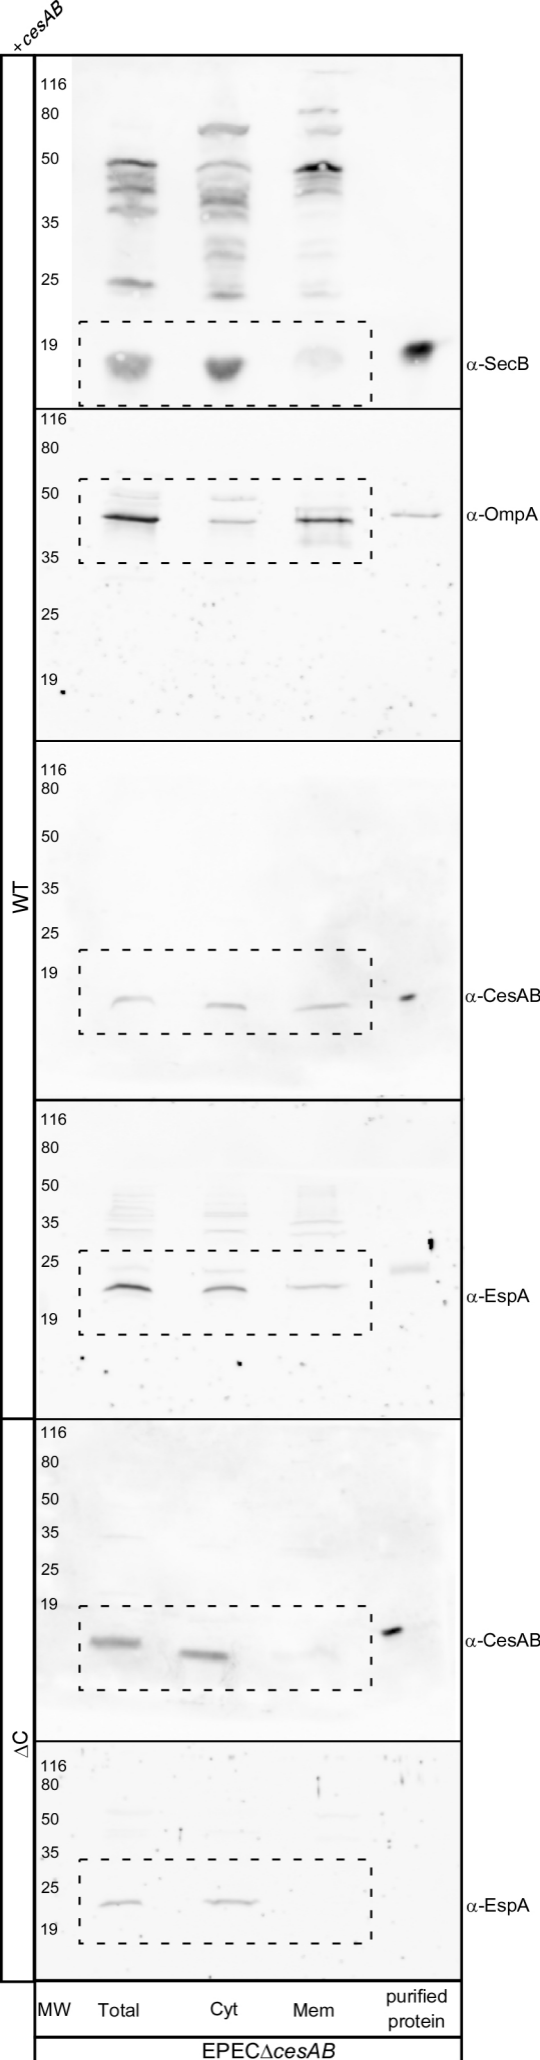

Supplement: EMBJ-36-3517-s003.pdf [file EMBJ-36-3517-s003.pdf]

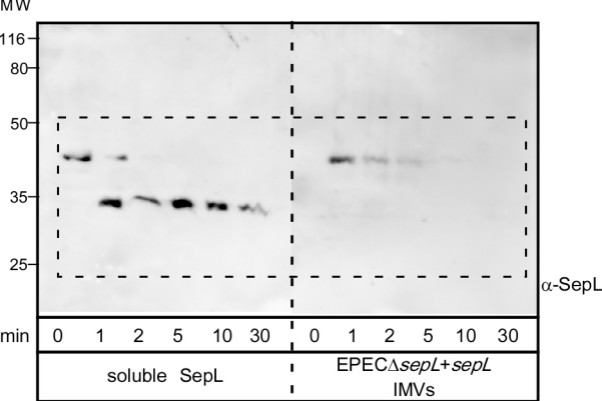

Source Data Fig. 3, Portaliou et al

Supplement: EMBJ-36-3517-s005.pdf [file EMBJ-36-3517-s005.pdf]
